# Supplementary material for: Distinct Stage Changes in Early-Life Colonization and Acquisition of the Gut Microbiota and Its Correlations With Volatile Fatty Acids in Goat Kids
Source: Front Microbiol. 2020 Oct 9;11:584742. doi: 10.3389/fmicb.2020.584742 (PMC7581860; doi:10.3389/fmicb.2020.584742)
Supplement: Supplementary file 1 [file Data_Sheet_1.ZIP]

Archive with 10 entries (9 files):
- Supplementary_materials_0902/
- Supplementary_materials_0902/Supplementary Figures.pdf
- Supplementary_materials_0902/Table S1 Summary of raw read pairs and high-quality tags for all 123 microbial samples included in this study.xlsx
- Supplementary_materials_0902/Table S2 Comparisons of the Shannon index and the obersved OTUs among all 13 sampling groups using ANOVA.xlsx
- Supplementary_materials_0902/Table S3 The analysis of similarity of bacterial populations among all sampling groups.xlsx
- Supplementary_materials_0902/Table S4 The bacterial community composition in the feces of goat kids across seven different age groups.xlsx
- Supplementary_materials_0902/Table S5 The bacterial biomarkers in the fecal microbiota of 56-day-old kids and their mothers using LEfSe analysis.xlsx
- Supplementary_materials_0902/Table S6 The bacterial community composition in four body sites of the kids' mothers.xlsx
- Supplementary_materials_0902/Table S7 The bacterial community composition in the rumen of 56-day-old kids and their mothers.xlsx
- Supplementary_materials_0902/Table S8 The bacterial biomarkers in the rumen microbiota of 56-day-old kids and their mothers using LEfSe analysis.xlsx
