# Supplementary material for: Distinct Stage Changes in Early-Life Colonization and Acquisition of the Gut Microbiota and Its Correlations With Volatile Fatty Acids in Goat Kids
Source: Front Microbiol. 2020 Oct 9;11:584742. doi: 10.3389/fmicb.2020.584742 (PMC7581860; doi:10.3389/fmicb.2020.584742)
Supplement: Supplementary file 1 [file Data_Sheet_1.ZIP › Supplementary_materials_0902/Table S1 Summary of raw read pairs and high-quality tags for all 123 microbial samples included in this study.xlsx]

## Sheet: Sheet1
Table S1. Summary of raw read pairs and high-quality tags for all 123 microbial samples included in this study
Sample name	Group	Raw paired reads	Raw tags	Clean tags1	Clean tags2
D0_2	FE-D0	28985	24987	19454	18014
D0_4	FE-D0	71731	65157	53574	53406
D0_5	FE-D0	74826	67815	29448	29287
D0_6	FE-D0	74404	65968	53439	53384
D0_7	FE-D0	67986	64116	49895	49702
D0_8	FE-D0	61008	48992	37844	35207
D0_9	FE-D0	67287	57458	42391	41900
D0_10	FE-D0	70835	66760	54598	54523
D0_11	FE-D0	52269	42049	31437	30384
D7_1	FE-D7	59099	52032	41314	41298
D7_2	FE-D7	75021	66032	50782	50682
D7_3	FE-D7	70204	66588	52041	51961
D7_4	FE-D7	60333	54872	42069	41946
D7_5	FE-D7	72148	63689	47611	47530
D7_6	FE-D7	75261	64253	31866	31863
D7_7	FE-D7	75681	69058	53358	53233
D7_8	FE-D7	68028	60560	45953	45831
D7_9	FE-D7	80575	67622	51722	51699
D7_10	FE-D7	69121	60052	45994	45977
D7_11	FE-D7	70074	61113	47040	46903
D14_1	FE-D14	67629	62644	49545	49535
D14_2	FE-D14	65245	60769	30271	30241
D14_3	FE-D14	72356	66287	48239	48208
D14_4	FE-D14	73071	60326	46697	46522
D14_5	FE-D14	74585	65292	51210	51172
D14_6	FE-D14	73159	66231	53200	53186
D14_7	FE-D14	76267	69703	54268	54241
D14_8	FE-D14	76450	63261	50619	50617
D14_9	FE-D14	75346	66160	49116	49085
D14_10	FE-D14	76462	67340	52089	52076
D14_11	FE-D14	73501	62599	49381	49237
D21_1	FE-D21	72256	60741	24432	24355
D21_2	FE-D21	65210	61120	48019	47944
D21_3	FE-D21	64836	55035	43288	43230
D21_4	FE-D21	71351	60029	47538	47472
D21_5	FE-D21	78744	66878	52635	52540
D21_6	FE-D21	64464	56177	44112	44093
D21_7	FE-D21	75938	65405	51416	51370
D21_8	FE-D21	66821	60965	47961	47955
D21_9	FE-D21	79366	67917	53788	53774
D21_10	FE-D21	74650	65675	49495	49230
D21_11	FE-D21	78042	66840	34014	33955
D28_4	FE-D28	55153	49118	37038	36854
D28_5	FE-D28	52657	45111	34031	33576
D28_6	FE-D28	69215	60059	40772	40736
D28_7	FE-D28	54263	50190	36613	25154
D28_8	FE-D28	73366	67199	34014	33658
D28_9	FE-D28	72665	67233	48943	47021
D28_10	FE-D28	71130	61442	44124	43427
D28_11	FE-D28	76091	67100	48986	48480
D42_1	FE-D42	73058	63880	46847	46181
D42_3	FE-D42	77031	66582	30795	30231
D42_4	FE-D42	72032	67475	50853	50428
D42_5	FE-D42	74734	68512	51203	51095
D42_6	FE-D42	76918	68233	51867	51473
D42_7	FE-D42	78224	69298	37449	36750
D42_8	FE-D42	72522	67519	50053	49562
D42_9	FE-D42	73863	67144	49346	49184
D42_10	FE-D42	60272	55552	38509	36659
D42_11	FE-D42	74105	69455	50342	49579
D56_1	FE-D56	49559	46736	34845	33564
D56_2	FE-D56	71916	64631	48137	47609
D56_3	FE-D56	62586	55607	40514	39263
D56_4	FE-D56	63772	59631	43005	42004
D56_5	FE-D56	75272	63023	45957	44488
D56_6	FE-D56	67340	61543	26838	25618
D56_7	FE-D56	77762	67178	49910	47629
D56_8	FE-D56	69270	63843	46240	45447
D56_9	FE-D56	73443	63013	47117	46561
D56_10	FE-D56	68676	63464	44942	43653
D56_11	FE-D56	75867	63387	47822	47275
RU-D56_1	RU-56	72919	67023	50201	48430
RU-D56_2	RU-56	68664	61454	46297	43289
RU-D56_3	RU-56	71522	64700	39822	43521
RU-D56_4	RU-56	77030	58108	43757	49135
RU-D56_5	RU-56	67807	61286	45287	40558
RU-D56_6	RU-56	64025	69109	50302	42513
RU-D56_7	RU-56	76165	58370	41664	47491
RU-D56_8	RU-56	76604	56769	43546	47814
RU-D56_9	RU-56	64339	66877	49234	41582
RU-D56_10	RU-56	71517	66786	49187	45765
RU-D56_11	RU-56	75422	56819	42427	38851
FE-M_1	FE-M	72071	62320	45633	44088
FE-M_2	FE-M	66596	62770	47633	45763
FE-M_3	FE-M	65407	60530	44163	42726
FE-M_4	FE-M	69248	59625	43571	41624
FE-M_5	FE-M	76553	64971	47521	46224
FE-M_6	FE-M	69394	65593	48357	46399
FE-M_7	FE-M	66992	60978	45106	44183
FE-M_8	FE-M	66789	63424	34427	32967
FE-M_9	FE-M	61237	49185	35379	33969
MI-M_1	MI-M	35359	33420	24596	23440
MI-M_2	MI-M	25442	17833	13398	12898
MI-M_3	MI-M	64011	58254	42475	41136
MI-M_4	MI-M	38177	33735	25158	23998
MI-M_5	MI-M	61908	53972	40300	36574
MI-M_6	MI-M	34834	32497	24596	22502
MI-M_7	MI-M	60226	54012	41408	40743
MI-M_8	MI-M	61342	49166	36763	31126
MI-M_9	MI-M	33393	30259	22385	21521
OC-M_1	OC-M	77890	66367	39358	37812
OC-M_2	OC-M	70952	60186	42919	41157
OC-M_3	OC-M	77426	64299	47472	46690
OC-M_4	OC-M	74678	67280	49265	45744
OC-M_5	OC-M	63316	55620	43911	43055
OC-M_6	OC-M	63360	57856	43261	42502
OC-M_7	OC-M	61524	57782	42989	40731
OC-M_8	OC-M	63800	60596	43900	43084
OC-M_9	OC-M	73615	60586	36291	35082
VA-M_1	VA-M	63335	57526	44013	41178
VA-M_2	VA-M	59497	52286	39765	37782
VA-M_3	VA-M	75091	68503	37965	34213
VA-M_4	VA-M	93343	58654	41406	34222
VA-M_5	VA-M	59050	50960	38732	38117
VA-M_6	VA-M	71744	67694	51041	48740
VA-M_7	VA-M	77666	65970	50192	47819
VA-M_8	VA-M	44480	33652	25188	22943
VA-M_9	VA-M	87967	63168	42145	32756
RU-M_1	RU-M	68561	60885	45717	44605
RU-M_4	RU-M	65803	60588	44891	43375
RU-M_5	RU-M	72146	61420	46878	46096
RU-M_7	RU-M	77089	64556	46735	45391
RU-M_9	RU-M	76623	67043	50180	49373
Total		8387336	7373047	5329082	5191224
Average		68189.7	59943.5	43325.9	42205.1
Note:
Clean tags1 refer to as the tags that were retained after denoise of raw tags in QIIME2
Clean tags2 were obtained from Clean tags1 after dsicarding the tags supporting the OTUs with less than 10 supported tags and the OTUs that were only detected in one sample
Clean tags2 supported 8694 OTUs and were used for the downstream analyses.
