# Supplementary material for: Distinct Stage Changes in Early-Life Colonization and Acquisition of the Gut Microbiota and Its Correlations With Volatile Fatty Acids in Goat Kids
Source: Front Microbiol. 2020 Oct 9;11:584742. doi: 10.3389/fmicb.2020.584742 (PMC7581860; doi:10.3389/fmicb.2020.584742)
Supplement: Supplementary file 1 [file Data_Sheet_1.ZIP › Supplementary_materials_0902/Table S2 Comparisons of the Shannon index and the obersved OTUs among all 13 sampling groups using ANOVA.xlsx]

## Sheet: Sheet1
Table S2 Comparison of the Shannon index and the observed OTUs among allamong all 13 sampling groups using ANOVA
Alpha diversity	FE-D0	FE-D7	FE-D14	FE-D21	FE-D28	FE-D42	FE-D56	VA-M	MI-M	OC-M	FE-M	RU-D56	RU-M	P-value
Shannon	4.34f	4.26f	4.67f	4.93f	5.97e	6.35de	7.04cd	7.75bc	8.14ab	8.36ab	8.82a	8.30ab	9.05a	2.2 × 10-16
Observed_OTUs	277ef	154.82f	206.55f	241.91f	461.63d	437.7de	582.91d	1036.56abc	977.33bc	1013.78abc	1140.33ab	945.45c	1176.6a	2.2 × 10-16
Note: Values with different letter superscripts within a row indicate a significant difference (P < 0.05, one-way ANOVA and Duncan's tests).
