# Supplementary material for: Distinct Stage Changes in Early-Life Colonization and Acquisition of the Gut Microbiota and Its Correlations With Volatile Fatty Acids in Goat Kids
Source: Front Microbiol. 2020 Oct 9;11:584742. doi: 10.3389/fmicb.2020.584742 (PMC7581860; doi:10.3389/fmicb.2020.584742)
Supplement: Supplementary file 1 [file Data_Sheet_1.ZIP › Supplementary_materials_0902/Table S3 The analysis of similarity of bacterial populations among all sampling groups.xlsx]

## Sheet: List
Table S3 The analysis of similarity of bacterial populations among all sampling groups
Table S3-1 The analysis of similarity of bacterial populations among all sampling groups using the unweighted UniFrac distance
Table S3-2 The analysis of similarity of bacterial populations among all sampling groups using the Jaccard distance

## Sheet: Table S3-1
Table S3-1 The analysis of similarity of bacterial populations among all sampling groups using the unweighted UniFrac distance
Group 1	Group 2	Sample size	R-value	p-value	q-value
FE-D0	FE-D7	20	0.273393	0.002	0.00222857
FE-D0	FE-D14	20	0.445887	0.001	0.00118182
FE-D0	FE-D21	20	0.418581	0.001	0.00118182
FE-D0	FE-D28	17	0.336372	0.003	0.00316216
FE-D0	FE-D42	19	0.675171	0.001	0.00118182
FE-D0	FE-D56	20	0.809302	0.001	0.00118182
FE-D0	FE-M	18	0.961248	0.001	0.00118182
FE-D0	MI-M	18	0.926269	0.001	0.00118182
FE-D0	RU-M	14	0.996135	0.001	0.00118182
FE-D0	OC-M	18	0.988683	0.001	0.00118182
FE-D0	RU-D56	20	0.999556	0.001	0.00118182
FE-D0	VA-M	18	0.881687	0.001	0.00118182
FE-D7	FE-D14	22	0.313599	0.001	0.00118182
FE-D7	FE-D21	22	0.430954	0.001	0.00118182
FE-D7	FE-D28	19	0.778204	0.001	0.00118182
FE-D7	FE-D42	21	0.941273	0.001	0.00118182
FE-D7	FE-D56	22	0.997295	0.001	0.00118182
FE-D7	FE-M	20	1	0.001	0.00118182
FE-D7	MI-M	20	1	0.001	0.00118182
FE-D7	RU-M	16	1	0.001	0.00118182
FE-D7	OC-M	20	1	0.001	0.00118182
FE-D7	RU-D56	22	1	0.001	0.00118182
FE-D7	VA-M	20	0.99445	0.001	0.00118182
FE-D14	FE-D21	22	0.0871525	0.022	0.02288
FE-D14	FE-D28	19	0.726177	0.001	0.00118182
FE-D14	FE-D42	21	0.844182	0.001	0.00118182
FE-D14	FE-D56	22	0.982569	0.002	0.00222857
FE-D14	FE-M	20	1	0.001	0.00118182
FE-D14	MI-M	20	1	0.001	0.00118182
FE-D14	RU-M	16	1	0.001	0.00118182
FE-D14	OC-M	20	1	0.001	0.00118182
FE-D14	RU-D56	22	1	0.001	0.00118182
FE-D14	VA-M	20	0.990454	0.001	0.00118182
FE-D21	FE-D28	19	0.548467	0.001	0.00118182
FE-D21	FE-D42	21	0.703818	0.001	0.00118182
FE-D21	FE-D56	22	0.92562	0.001	0.00118182
FE-D21	FE-M	20	1	0.001	0.00118182
FE-D21	MI-M	20	1	0.001	0.00118182
FE-D21	RU-M	16	1	0.001	0.00118182
FE-D21	OC-M	20	1	0.001	0.00118182
FE-D21	RU-D56	22	1	0.001	0.00118182
FE-D21	VA-M	20	0.982684	0.001	0.00118182
FE-D28	FE-D42	18	0.268151	0.003	0.00316216
FE-D28	FE-D56	19	0.503834	0.001	0.00118182
FE-D28	FE-M	17	0.946615	0.001	0.00118182
FE-D28	MI-M	17	0.852865	0.001	0.00118182
FE-D28	RU-M	13	0.898684	0.001	0.00118182
FE-D28	OC-M	17	0.945747	0.001	0.00118182
FE-D28	RU-D56	19	0.955915	0.001	0.00118182
FE-D28	VA-M	17	0.749132	0.001	0.00118182
FE-D42	FE-D56	21	0.194545	0.023	0.0236053
FE-D42	FE-M	19	1	0.001	0.00118182
FE-D42	MI-M	19	0.99808	0.001	0.00118182
FE-D42	RU-M	15	1	0.003	0.00316216
FE-D42	OC-M	19	1	0.001	0.00118182
FE-D42	RU-D56	21	1	0.001	0.00118182
FE-D42	VA-M	19	0.933882	0.001	0.00118182
FE-D56	FE-M	20	0.999334	0.001	0.00118182
FE-D56	MI-M	20	0.994228	0.001	0.00118182
FE-D56	RU-M	16	1	0.001	0.00118182
FE-D56	OC-M	20	1	0.001	0.00118182
FE-D56	RU-D56	22	1	0.001	0.00118182
FE-D56	VA-M	20	0.92119	0.001	0.00118182
FE-M	MI-M	18	0.584705	0.001	0.00118182
FE-M	RU-M	14	1	0.001	0.00118182
FE-M	OC-M	18	0.998628	0.001	0.00118182
FE-M	RU-D56	20	0.948052	0.001	0.00118182
FE-M	VA-M	18	0.524005	0.001	0.00118182
MI-M	RU-M	14	0.58744	0.002	0.00222857
MI-M	OC-M	18	0.662894	0.001	0.00118182
MI-M	RU-D56	20	0.824398	0.001	0.00118182
MI-M	VA-M	18	0.105281	0.062	0.0628052
RU-M	OC-M	14	0.677295	0.002	0.00222857
RU-M	RU-D56	16	0.532308	0.003	0.00316216
RU-M	VA-M	14	0.0173913	0.352	0.352
OC-M	RU-D56	20	0.909424	0.001	0.00118182
OC-M	VA-M	18	0.275377	0.001	0.00118182
RU-D56	VA-M	20	0.602842	0.001	0.00118182

## Sheet: Table S3-2
Table S3-2 The analysis of similarity of bacterial populations among all sampling groups using the Jaccard distance
Group 1	Group 2	Sample size	R-value	p-value	q-value
FE-D0	FE-D7	20	0.349872	0.001	0.00113043
FE-D0	FE-D14	20	0.523477	0.001	0.00113043
FE-D0	FE-D21	20	0.598846	0.001	0.00208
FE-D0	FE-D28	17	0.791233	0.002	0.00113043
FE-D0	FE-D42	19	0.947188	0.001	0.00113043
FE-D0	FE-D56	20	0.988234	0.001	0.00113043
FE-D0	FE-M	18	0.98594	0.001	0.00113043
FE-D0	MI-M	18	0.957819	0.001	0.00113043
FE-D0	RU-M	14	1	0.001	0.00113043
FE-D0	OC-M	18	0.999314	0.001	0.00113043
FE-D0	RU-D56	20	1	0.001	0.00113043
FE-D0	VA-M	18	0.91941	0.001	0.00113043
FE-D7	FE-D14	22	0.327198	0.001	0.00113043
FE-D7	FE-D21	22	0.523516	0.001	0.00113043
FE-D7	FE-D28	19	0.877327	0.001	0.00113043
FE-D7	FE-D42	21	0.960909	0.001	0.00113043
FE-D7	FE-D56	22	0.997746	0.001	0.00113043
FE-D7	FE-M	20	1	0.001	0.00113043
FE-D7	MI-M	20	1	0.001	0.00113043
FE-D7	RU-M	16	1	0.001	0.00113043
FE-D7	OC-M	20	1	0.001	0.00113043
FE-D7	RU-D56	22	1	0.001	0.00113043
FE-D7	VA-M	20	0.999112	0.001	0.00113043
FE-D14	FE-D21	22	0.207739	0.002	0.00208
FE-D14	FE-D28	19	0.752738	0.001	0.00113043
FE-D14	FE-D42	21	0.878	0.001	0.00113043
FE-D14	FE-D56	22	0.966491	0.001	0.00113043
FE-D14	FE-M	20	1	0.001	0.00113043
FE-D14	MI-M	20	1	0.001	0.00113043
FE-D14	RU-M	16	1	0.001	0.00113043
FE-D14	OC-M	20	1	0.001	0.00113043
FE-D14	RU-D56	22	1	0.001	0.00113043
FE-D14	VA-M	20	0.99889	0.001	0.00113043
FE-D21	FE-D28	19	0.581051	0.001	0.00113043
FE-D21	FE-D42	21	0.734	0.001	0.00113043
FE-D21	FE-D56	22	0.902479	0.001	0.00113043
FE-D21	FE-M	20	1	0.001	0.00113043
FE-D21	MI-M	20	1	0.001	0.00113043
FE-D21	RU-M	16	1	0.001	0.00113043
FE-D21	OC-M	20	1	0.001	0.00113043
FE-D21	RU-D56	22	1	0.001	0.00113043
FE-D21	VA-M	20	0.998224	0.001	0.00113043
FE-D28	FE-D42	18	0.34589	0.002	0.00208
FE-D28	FE-D56	19	0.659365	0.001	0.00113043
FE-D28	FE-M	17	1	0.001	0.00113043
FE-D28	MI-M	17	0.953559	0.001	0.00113043
FE-D28	RU-M	13	0.956579	0.001	0.00113043
FE-D28	OC-M	17	0.985677	0.001	0.00113043
FE-D28	RU-D56	19	0.989595	0.001	0.00113043
FE-D28	VA-M	17	0.861111	0.001	0.00113043
FE-D42	FE-D56	21	0.188909	0.018	0.0182338
FE-D42	FE-M	19	1	0.001	0.00113043
FE-D42	MI-M	19	1	0.001	0.00113043
FE-D42	RU-M	15	1	0.001	0.00113043
FE-D42	OC-M	19	1	0.001	0.00113043
FE-D42	RU-D56	21	1	0.001	0.00113043
FE-D42	VA-M	19	0.995336	0.001	0.00113043
FE-D56	FE-M	20	0.989566	0.001	0.00113043
FE-D56	MI-M	20	1	0.001	0.00113043
FE-D56	RU-M	16	1	0.001	0.00113043
FE-D56	OC-M	20	1	0.001	0.00113043
FE-D56	RU-D56	22	1	0.001	0.00113043
FE-D56	VA-M	20	0.985126	0.001	0.00113043
FE-M	MI-M	18	0.849794	0.001	0.00113043
FE-M	RU-M	14	1	0.001	0.00113043
FE-M	OC-M	18	0.997599	0.001	0.00113043
FE-M	RU-D56	20	0.951604	0.001	0.00113043
FE-M	VA-M	18	0.680384	0.001	0.00113043
MI-M	RU-M	14	0.884058	0.002	0.00208
MI-M	OC-M	18	0.886145	0.001	0.00113043
MI-M	RU-D56	20	0.922744	0.001	0.00113043
MI-M	VA-M	18	0.230453	0.005	0.00513158
RU-M	OC-M	14	0.601932	0.002	0.00208
RU-M	RU-D56	16	0.565874	0.002	0.00208
RU-M	VA-M	14	0.0425121	0.32	0.32
OC-M	RU-D56	20	0.893884	0.001	0.00113043
OC-M	VA-M	18	0.279492	0.001	0.00113043
RU-D56	VA-M	20	0.671884	0.001	0.00113043
