# Supplementary material for: Distinct Stage Changes in Early-Life Colonization and Acquisition of the Gut Microbiota and Its Correlations With Volatile Fatty Acids in Goat Kids
Source: Front Microbiol. 2020 Oct 9;11:584742. doi: 10.3389/fmicb.2020.584742 (PMC7581860; doi:10.3389/fmicb.2020.584742)
Supplement: Supplementary file 1 [file Data_Sheet_1.ZIP › Supplementary_materials_0902/Table S4 The bacterial community composition in the feces of goat kids across seven different age groups.xlsx]

## Sheet: List
Table S4 The bacterial community composition in the feces of goat kids across seven different age groups
Table S4-1The bacterial community composition at the phylum level
Table S4-2The bacterial community composition at the genus level

## Sheet: S4-1
Table S4-1 The bacterial community composition at the phylum level (%)
	Phylum	D0	D7	D14	D21	D28	D42	D56
Top 10	Firmicutes	42.6913	51.5747	37.319	37.7846	58.7062	58.5971	62.6644
	Bacteroidetes	4.27516	39.9805	45.3371	39.0064	18.1256	25.4837	21.9224
	Proteobacteria	49.4383	8.11969	14.6282	20.9515	17.8187	13.6827	10.9407
	Verrucomicrobia	0.0705689	0.0960427	2.1457	1.51392	1.94516	0.171562	0.0313552
	Epsilonbacteraeota	0.0389208	0.000866915	0.00924887	0.104071	0.493531	1.18105	3.64436
	Actinobacteria	2.42235	0.216741	0.550726	0.599744	1.0703	0.276375	0.237897
	Cyanobacteria	0.335472	0.000387647	0	0.0127962	1.03568	0.0723232	0.0486232
	Tenericutes	0.00658782	0.00178313	0	0.0199596	0.176377	0.504229	0.421491
	Fusobacteria	0.155333	0	0.000377154	0.00110797	0.433186	0.00151577	0.00190949
	Gemmatimonadetes	0.181824	0.00370497	0.00410513	0.00320841	0.0462153	0	0
Others	Chloroflexi	0.149892	0.000650187	0.000502806	0	0.0524538	0.00256255	0
	Acidobacteria	0.137661	0.00490221	0.00234643	0.00265454	0.0378854	0	0
	Patescibacteria	0.0214883	0	0.0023095	0	0.0232098	0.0198793	0.0701351
	Spirochaetes	0.0442134	0	0	0	0.00505093	0.00290359	0.0111843
	WPS-2	0.0236695	0	0.000335204	0	0.000797516	0	0
	Nitrospirae	0	0	0	0	0.0223622	0	0
	Fibrobacteres	0.00731379	0	0	0	0.00250669	0.00262327	0.00210387
	Synergistetes	0	0	0	0	0.000863518	0.00109114	0.00263935
	Deferribacteres	0	0	0	0	0.00397551	0	0
	Planctomycetes	0	0	0	0	0	0	0.000833016
	Elusimicrobia	0	0	0	0	0	0.000388553	0
Note: The "Others" proportion represented the phyla with low abundances

## Sheet: S4-2
Table S4-2 The bacterial community composition at the genus level (%)
	Genus	D0	D7	D14	D21	D28	D42	D56
Top 20	Bacteroides	3.35605	38.518	30.0081	21.3604	5.36118	11.8277	7.92403
	Escherichia-Shigella	34.7272	6.75509	10.5637	15.2506	11.5488	7.91359	5.76217
	Lactobacillus	1.21881	11.3408	8.42641	8.1434	2.93918	2.1303	0.440261
	Parabacteroides	0.325786	1.2965	5.55822	12.4263	3.94483	5.42234	1.84455
	Ruminococcaceae UCG-005	0.47282	0.0866295	0.24861	0.740916	5.05015	10.4341	11.0713
	Butyricicoccus	4.56825	12.952	2.46204	2.40094	1.89775	2.86154	0.394155
	Alistipes	0.124468	0.114397	9.23539	4.10691	4.16212	4.16135	2.34616
	Ruminococcaceae UCG-014	0.245175	0.734138	0.619308	1.67664	9.44248	2.75804	2.25146
	Desulfovibrio	0.24587	0.216192	2.50786	4.36721	2.47395	2.80536	1.74181
	Clostridium sensu stricto 1	10.7945	0.950867	0.452696	0.253181	0.469115	0.698175	0.7198
	[Eubacterium] coprostanoligenes group	0.809278	3.52131	1.93206	1.15327	1.51654	1.46266	3.33317
	Lachnoclostridium	1.26908	3.77999	4.35975	2.02933	0.785168	0.567773	0.652663
	Blautia	0.842863	1.58414	1.38336	1.56367	2.32777	3.72529	2.00364
	Epulopiscium	10.938	0.476858	0.360727	0.125934	0.0390605	0.437965	0.0280176
	Faecalibacterium	0.36403	0.133984	0.583316	1.0108	7.02889	0.768597	1.67232
	Fournierella	0.521319	1.49576	1.30183	2.16372	0.993171	1.37684	0.915976
	Christensenellaceae R-7 group	0.290423	0.0433055	0.0914545	0.253966	1.3639	2.65768	4.05019
	Succinivibrio	1.15651	0.0542941	0.128267	0.089704	0.997556	2.37321	3.10355
	[Ruminococcus] gnavus group	0.443025	2.74152	1.62263	1.28713	0.251026	0.364291	0.0566254
	Citrobacter	6.11875	0.16939	0.00248716	0.0598199	0.00265839	0	0.000817381
Others	Subdoligranulum	0.29955	0.201092	0.961756	1.54829	0.397975	0.454478	2.12658
	Akkermansia	0.0683597	0.0960427	2.1457	1.51392	1.94516	0.171562	0.0313552
	Campylobacter	0.011783	0.000866915	0.00889973	0.102701	0.457508	1.18105	3.64359
	Intestinimonas	0.42618	0.993207	1.36241	0.97098	0.26354	0.566788	0.69625
	Ruminiclostridium 9	0.254019	0.572381	0.616356	0.943495	1.03166	0.955596	0.687979
	[Ruminococcus] torques group	0.154432	0.108569	0.228901	0.800407	1.2371	1.3409	1.14876
	Ruminococcaceae NK4A214 group	0.0655263	0.0289007	0.0595045	0.181222	2.32976	1.13836	0.94717
	Ruminococcus 2	0.423032	1.02974	0.617157	0.745011	0.838893	0.279573	0.402241
	Roseburia	0.0564907	0.0202152	0.114065	0.22864	0.304705	0.851695	1.94634
	Tyzzerella	0.255566	0.478498	0.840151	0.478956	0.148842	0.720247	0.157276
	[Ruminococcus] gauvreauii group	0.0683746	0.00690434	0.0198406	0.12792	1.59016	0.968568	0.272788
	Oscillospira	0.0365315	0.063703	0.138492	0.807234	0.667049	0.991982	0.331599
	Parasutterella	0.13715	0.606107	0.817293	0.305423	0.425826	0.36166	0.203418
	GCA-900066225	0.274257	1.34738	0.450618	0.233884	0.249955	0.113279	0.0624823
	Faecalicoccus	0.0350422	0.059263	1.70963	0.663246	0.121175	0.0993892	0.0131558
	Lachnospiraceae NK4A136 group	0.159454	0.050467	0.0221122	0.134756	0.494093	0.819245	0.966347
	Oscillibacter	0.0584902	0.0944925	0.179835	0.182012	0.494539	0.47851	0.92502
	Rikenellaceae RC9 gut group	0.14746	0	0	0.0103411	0.330112	0.0874006	1.79763
	Lachnospiraceae UCG-010	0.00914224	0.00311862	0.0235581	0.0135008	0.474264	0.757173	1.02615
	Anaerotruncus	0.192537	0.854771	0.563032	0.228087	0.193582	0.0574493	0.0424663
	Anaerofilum	0.00493443	0	0	0.769485	0.89836	0.295017	0.105116
	Flavonifractor	0.178594	0.331869	0.292888	0.594342	0.166035	0.427239	0.0658161
	Tyzzerella 4	0.10821	0.0398099	0.0860061	0.174278	0.148602	1.231	0.235975
	Butyricimonas	0.0043464	0.0252845	0.393465	0.26504	0.220154	0.708498	0.313515
	Prevotellaceae NK3B31 group	0.00315594	0	0	0.00664783	0.057437	0.0367888	1.76638
	Ruminococcaceae UCG-010	0.0999308	0.0138217	0.0392679	0.0456813	0.194023	0.426817	1.01746
	Turicibacter	0.590925	0.0433707	0.142916	0.138523	0.255149	0.302136	0.353826
	Ruminococcaceae UCG-013	0.0701738	0.00982315	0.0280776	0.0428927	0.109072	0.463725	1.08187
	UBA1819	0.186521	0.815112	0.258384	0.265847	0.123496	0.101338	0.0351859
	Ruminococcaceae UCG-002	0.0721911	0.00861251	0.0136244	0.0191222	0.0711494	0.527769	1.06054
	Prevotella 1	0.0466628	0	0.00368986	0.0151393	1.29337	0.108108	0.0974035
	Sellimonas	0.20384	0.657055	0.435739	0.146704	0.0542863	0.00910073	0.0195041
	Erysipelatoclostridium	0.0664673	0.0529388	0.215552	0.48312	0.231385	0.248601	0.0309341
	Faecalitalea	0.080547	0.767146	0.0849303	0.0527823	0.0456729	0.0993359	0.173383
	Family XIII AD3011 group	0.0382248	0.00932166	0.0128993	0.0275655	0.247647	0.523182	0.397503
	Romboutsia	0.301259	0.0569163	0.0427948	0.0535653	0.246146	0.312812	0.212011
	Bilophila	0.0267505	0.030296	0.42222	0.5434	0.134615	0.0489705	0.00873109
	Agathobacter	0.0831339	0.00525061	0.00833024	0	0.0999866	0.0860139	0.912409
	Lachnospiraceae AC2044 group	0.0090512	0	0.0104944	0.0108257	0.0689503	0.298746	0.74885
	Succiniclasticum	0.00820544	0	0.00129245	0.0105002	0.797411	0.245094	0.0730104
	Caproiciproducens	0.119911	0.688136	0.135131	0.111989	0.0511867	0.0133224	0.00662743
	[Eubacterium] nodatum group	0.00499525	0.0178559	0.062265	0.127362	0.56554	0.233266	0.10912
	Bifidobacterium	0.463367	0.0203348	0.0614499	0.0923855	0.4105	0.0157511	0.02034
	Marinospirillum	0.971859	0.0456146	0.0176214	0.0121354	0	0	0
	Streptococcus	0.163828	0.00674027	0.00576295	0.00611249	0.0928702	0.103805	0.602019
	Odoribacter	0.00745918	0.00996	0.0537943	0.34194	0.236666	0.201682	0.110428
	Phascolarctobacterium	0.0175095	0.000988637	0.0229352	0.3355	0.088975	0.145564	0.350338
	Olsenella	0.108048	0.0401548	0.306847	0.177311	0.292825	0.00786706	0.00907839
	Corynebacterium 1	0.837517	0.0396517	0.0129141	0.0126812	0.00546633	0.00675649	0.00151501
	Marvinbryantia	0.00438827	0.00628299	0.0129383	0.0491871	0.396883	0.163747	0.191149
	Terrisporobacter	0.582612	0.0359146	0.0377256	0.0356367	0.018451	0.0937231	0.0110596
	Megasphaera	0.0444766	0.0190038	0.649573	0.0883859	0.00319006	0	0
	Allobaculum	0	0	0	0	0.00584845	0.745925	0.0144546
	Pseudoflavonifractor	0.0643677	0.119361	0.103841	0.177043	0.0852215	0.184497	0.0309692
	Ruminiclostridium	0.0396832	0.15891	0.0411851	0.0648703	0.243322	0.0810719	0.0903412
	Ruminococcus 1	0.0163859	0	0.00159889	0.0111533	0.129506	0.194622	0.345483
	Negativibacillus	0.0218475	0.0169591	0.0899205	0.179839	0.0876572	0.182118	0.0785883
	Cetobacterium	0.151677	0	0	0.00110797	0.430793	0.00151577	0.00190949
	Ruminococcaceae UCG-004	0.0143869	0.022491	0.0361436	0.0849536	0.172571	0.0952591	0.13032
	Dorea	0.0882921	0.00216066	0.000670409	0.00235689	0.191721	0.0662159	0.191415
	Sphingomonas	0.129869	0.0112836	0.0052761	0.0119361	0.358152	0.00324809	0.00458279
	Salinicoccus	0.455825	0.0264133	0.0119257	0.0113941	0	0	0
	Ruminococcaceae UCG-009	0.0193247	0	0.00177654	0.00151692	0.00983077	0.138229	0.33095
	Anaerostipes	0.0463787	0.0119152	0.0399304	0.0133861	0.142146	0.104742	0.121758
	Coprococcus 3	0.00441831	0.0024618	0.0439694	0	0.0217301	0.0291429	0.378429
	Erysipelotrichaceae UCG-003	0.0330221	0	0.00118319	0.00643872	0.127906	0.119237	0.173463
	Glutamicibacter	0.0978478	0.0788431	0.122952	0.0955767	0	0.0233743	0.0322926
	[Eubacterium] hallii group	0.109965	0.00626988	0.00332321	0.00692806	0.245763	0.022971	0.0212607
	Clostridioides	0.162868	0.154963	0.0677577	0.0230864	0.00265839	0	0
	Chujaibacter	0.364141	0.00317372	0.00335204	0.0046012	0.00298163	0	0
	Defluviicoccus	0.0737459	0.00119014	0	0.00110797	0.293739	0.00433079	0.00286424
	GCA-900066575	0.00512293	0.00659986	0.0118264	0.0707737	0.0486202	0.145385	0.0865329
	Jeotgalicoccus	0.344951	0.0132833	0.0039083	0.00521947	0	0	0
	Candidatus Soleaferrea	0.00845695	0.00417959	0.0130571	0.0239641	0.0359267	0.0773511	0.179218
	Ruminiclostridium 5	0.0354877	0.0612264	0.0426405	0.0240224	0.0122715	0.0632077	0.0748237
	Ruminococcaceae UCG-011	0.0177472	0.00456222	0	0.00683249	0.180626	0.0554464	0.0456972
	Fusicatenibacter	0.0553224	0.00367432	0.02238	0.0121584	0.212605	0.00243427	0
	Azospirillum sp. 47_25	0.00532243	0.00282168	0.052058	0.174387	0.0106359	0.0347916	0.0207205
	Staphylococcus	0.255316	0.0115761	0.00467184	0.00399554	0.0173371	0	0
	Clostridium sensu stricto 6	0.0786248	0.0122604	0.00692849	0.00529436	0.000531677	0.0970875	0.0873243
	Holdemanella	0.109325	0.000991786	0	0	0.16911	0.000403397	0
	[Eubacterium] brachy group	0.0181432	0.0017985	0.000377154	0.00737838	0.0575381	0.10846	0.076334
	Collinsella	0.0299926	0	0.0109062	0.175413	0.0512305	0	0.00187429
	Pseudomonas	0.150639	0.0226227	0.00556011	0.00474038	0.0837219	0	0
	Lachnospiraceae UCG-004	0	0	0	0	0.23587	0.00918897	0.0186646
	[Clostridium] innocuum group	0.0489165	0.105664	0.0195769	0.0240831	0.00414755	0.0257071	0.00538436
	Vibrio	0.0500812	0.00239632	0.00344512	0	0.162697	0.0010827	0.00236061
	Acinetobacter	0.179613	0.00386393	0.00195419	0	0.0335205	0	0
	Anaerosporobacter	0.0398409	0.00237588	0.0248425	0.00284423	0	0.0305521	0.115232
	Veillonella	0.0198318	0.101634	0.062307	0.0196599	0.00318611	0.00903922	0
	[Acetivibrio] ethanolgignens group	0	0	0	0.00129263	0.00237423	0.164275	0.0422522
	Lachnospiraceae NK3A20 group	0.0668442	0.00336558	0.00248716	0.00641283	0.045007	0.03714	0.0372462
	Enterococcus	0.0560726	0.0268127	0.00246892	0.00564788	0.0179019	0.00121991	0.0799101
	Atopostipes	0.170377	0.00346766	0.00573777	0.00920138	0	0	0
	Holdemania	0	0.00243915	0.0206263	0.0278948	0.0413842	0.0581212	0.0227694
	Bacillus	0.0693748	0	0.00150842	0.00168233	0.0947047	0.00281501	0.00140023
	Garicola	0.156753	0.00760251	0.00357075	0	0	0	0
	Cellulosilyticum	0.0311716	0.00569651	0.00177654	0.00300908	0	0.0403415	0.0818279
	Butyrivibrio	0	0.00140674	0.0083911	0.00410593	0.00594938	0.0207561	0.122628
	Erysipelotrichaceae UCG-004	0	0	0	0	0.0329875	0.0792931	0.0471108
	Lachnospiraceae UCG-007	0.0181212	0	0	0	0.00752903	0.00544218	0.124486
	Angelakisella	0	0	0.0010933	0.0171883	0.0585908	0.0402961	0.0289965
	Eggerthella	0.0129181	0.0111197	0.00870833	0.0123586	0.0528358	0.0430766	0.00400914
	Lachnoclostridium 10	0.00292552	0.000595072	0	0	0.0139126	0.0701294	0.0572394
	Merdibacter	0.00165161	0.00266587	0.00629935	0.0259641	0.0546864	0.0277202	0.0218153
	Hydrogenoanaerobacterium	0.00312784	0.00203198	0.0261843	0.0299395	0.00533099	0.0186384	0.0530394
	Prevotellaceae UCG-003	0.0140915	0.000896858	0	0.00372791	0.0900117	0.0123454	0.0163482
	Coprobacter	0.00493443	0.00153517	0.0118103	0.0326639	0.0683371	0.00563701	0.0105377
	Anaerovibrio	0.0339963	0.00467203	0.00106592	0.00132731	0.00606748	0.0237614	0.060886
	Pygmaiobacter	0	0	0	0	0	0.0861283	0.0435303
	Papillibacter	0.00717236	0	0	0.00344607	0.0215342	0.0430343	0.0544018
	Defluviitaleaceae UCG-011	0	0	0.00125715	0	0.0424231	0.0241435	0.0616048
	Candidatus Saccharimonas	0.0123361	0	0.0023095	0	0.0232098	0.0198793	0.0701351
	Breznakia	0	0	0	0	0.05568	0.0233852	0.0452409
	Clostridium sensu stricto 2	0.0140892	0.00549654	0.00397792	0.00164098	0	0.0969718	0.000763477
	Prevotellaceae UCG-001	0.0182963	0.00117075	0.000532962	0	0.0897646	0.00241053	0.0013288
	Lachnospiraceae XPB1014 group	0.00347153	0	0	0.00215943	0.0670626	0.019392	0.0210559
	Coprococcus 2	0.00873594	0	0.00360738	0.0014773	0.0613316	0.00826556	0.0273052
	Saccharofermentans	0.00655555	0	0	0.00139515	0.0624604	0.0185512	0.0213187
	Peptococcus	0.00446821	0.00779177	0.00963699	0.0548547	0.0250101	0.000649618	0.00711572
	Acetobacter	0.0762397	0.0179901	0.00723872	0.00587807	0.00149082	0	0
	Lachnospiraceae UCG-001	0.00923665	0	0.00663194	0	0	0.0132729	0.0786725
	Candidatus Stoquefichus	0	0	0	0	0	0.0800235	0.0256767
	Ruminococcaceae UCG-008	0	0	0	0.00221594	0.0371125	0.00812069	0.0571732
	Family XIII UCG-001	0.000731379	0	0	0.00393962	0.00801315	0.0337342	0.0579576
	Succinivibrionaceae UCG-002	0.00347153	0	0	0.000738648	0.0770714	0.00870254	0.0110321
	Psychrobacter	0.0853711	0.00374078	0.00410371	0.00397839	0	0	0
	Eubacterium	0.00752289	0.0132565	0.0252028	0.0323623	0.00452041	0.000993856	0.00410019
	Paeniclostridium	0.0256546	0.00293236	0.00151586	0.00129263	0.0188959	0.0250804	0.0110493
	Facklamia	0.0749104	0.00695908	0.00106592	0.00275799	0	0	0
	[Eubacterium] ruminantium group	0.00182845	0	0	0.00240061	0.0240517	0.0110332	0.046266
	Dubosiella	0.0282156	0	0	0	0.0535121	0	0.000572848
	gut metagenome	0	0	0	0	0	0.0163818	0.0648892
	[Eubacterium] fissicatena group	0.0111948	0.00317576	0.00906994	0.00538769	0.0205013	0.0201952	0.00840313
	DTU089	0	0.00619648	0.00651978	0.0155915	0.0413138	0.00532937	0.00173574
	Klebsiella	0.00410272	0	0.0231474	0	0.045469	0	0
	Ruminiclostridium 6	0.00441831	0	0	0	0.0281084	0.0109459	0.0289716
	Paracoccus	0.0183324	0.00705669	0.0102209	0.0157718	0.0188837	0	0
	Dielma	0	0	0	0.00129263	0.00985197	0.0432408	0.0158016
	Aliidiomarina	0.0641947	0	0.00266481	0.0016203	0	0	0
	Comamonas	0.0467262	0.010955	0.00624724	0.00450588	0	0	0
	[Anaerorhabdus] furcosa group	0	0	0	0	0.00503887	0.0146515	0.0470066
	Lysobacter	0.0074448	0	0	0.00231321	0.0549312	0	0
	Planococcus	0.0583205	0.000880518	0.00165172	0.00341307	0	0	0
	Rhodanobacter	0.0606875	0.00119014	0.00134082	0	0	0	0
	Lachnospiraceae NK4B4 group	0	0	0	0	0.00239255	0.0143402	0.0459437
	Streptomyces	0.050598	0	0.00312658	0	0.00845563	0	0
	Treponema 2	0.0442134	0	0	0	0.00398758	0.00235803	0.0111843
	Halomonas	0.0606408	0	0	0.000758461	0	0	0
	Dysgonomonas	0	0	0.00937637	0.0137345	0.0273146	0.00991438	0.000541706
	Anaerovorax	0.00402258	0	0	0	0.0173717	0.00999975	0.029244
	Paenalcaligenes	0.0487751	0.00107623	0.00538246	0.00455076	0	0	0
	dgA-11 gut group	0.000946781	0	0	0	0.0183187	0	0.0395162
	Serratia	0.0213437	0	0.00195411	0	0.0320826	0	0.00319378
	Faecalibaculum	0.0301523	0.00105506	0.0017587	0	0.0255179	0	0
	Helicobacter	0.019824	0	0.00034914	0.00136952	0.036023	0	0.000763798
	CAG-352	0.00279719	0	0	0.000530908	0.0511048	0.00175855	0.00185231
	Stappia	0.00372959	0	0	0	0.0512824	0.00282378	0
	Dietzia	0.0556897	0	0	0.00123878	0	0	0
	Eisenbergiella	0.00431763	0	0.00328318	0.0181022	0.0274882	0	0.00333698
	Butyrivibrio 2	0.00631188	0	0.000335204	0	0.0314066	0.0116213	0.00576013
	Phocea	0.00146276	0.0143028	0.00676928	0.0122691	0.00705764	0.0114011	0.00196308
	Marinilactibacillus	0.0520151	0.0023766	0	0	0	0	0
	Stenotrophomonas	0.0151165	0	0.00142123	0.00352839	0.0335033	0	0
	Lachnospiraceae FCS020 group	0.00255983	0.000387647	0	0.000568845	0.00892223	0.0204277	0.0201976
	Novosphingobium	0.00568069	0	0	0	0.0463162	0	0.000381899
	Oceanisphaera	0.0472555	0.00316293	0.00177654	0	0	0	0
	Moryella	0.0050495	0	0	0	0.0292293	0.00584656	0.0120134
	Mizugakiibacter	0.0517292	0	0	0	0	0	0
	Schwartzia	0.00623869	0.00574806	0.0245636	0.00672341	0	0	0.0083354
	DNF00809	0.00438187	0	0.00106592	0.00234409	0.00893802	0.0103529	0.0244031
	Enorma	0	0	0.000377154	0.00657556	0.0133562	0.00992359	0.0200673
	Ochrobactrum	0.00965396	0	0	0	0.0260763	0.0127324	0
	Tissierella	0.0296236	0.00652799	0.00213185	0.00398192	0.00447245	0	0
	Ruminococcaceae V9D2013 group	0.00284034	0.000433458	0	0	0.0325804	0.0029932	0.00745215
	Howardella	0	0	0	0	0	0.0421694	0.00269896
	Erysipelotrichaceae UCG-009	0	0	0	0.001327	0.0199581	0.00593148	0.0170188
	gut metagenome	0	0	0	0.000738648	0.0203474	0.0143491	0.00759555
	Dongia	0.0099264	0.00346766	0	0	0.027933	0	0
	Bradyrhizobium	0.0050495	0	0	0.0038779	0.032301	0	0
	Alcaligenes	0.0142872	0	0.00117247	0	0.0224858	0	0.00267329
	Megamonas	0	0	0	0.00129263	0	0.00169644	0.0370442
	Yaniella	0.0345176	0	0	0.00546758	0	0	0
	Gemmatimonas	0.0299814	0	0.00134082	0	0.00795102	0	0
	SP3-e08	0.00292552	0	0	0.000948076	0.0140201	0.00833109	0.0128192
	Acetitomaculum	0.00591615	0	0	0.00113769	0.0154171	0.00668428	0.00966505
	[Eubacterium] ventriosum group	0.000731379	0	0.000369271	0.00324707	0.00643515	0.00603976	0.0213828
	Skermanella	0	0	0	0	0.0378683	0	0
	Asteroleplasma	0	0	0	0.000738648	0	0.032125	0.00417687
	Ruminiclostridium 1	0.00511324	0	0	0.000568845	0.00198776	0.00819046	0.0211233
	Rikenella	0.00473391	0	0	0	0.0306153	0.000403397	0
	Dialister	0.0187343	0	0	0	0.0167618	0	0
	Lysinibacillus	0.00255983	0	0	0	0	0.0134394	0.0193468
	Mannheimia	0.033831	0.000650187	0	0	0	0.000545569	0
	Pseudobutyrivibrio	0	0	0	0.00129263	0.0251774	0.00490242	0.00362688
	Blastococcus	0.00707833	0	0	0	0.0278286	0	0
	Enteractinococcus	0.0303437	0	0.00159889	0.00208577	0	0	0
	Acidibacter	0.0312438	0	0	0.00106182	0	0	0
	Aliicoccus	0.0308889	0.00108364	0	0	0	0	0
	Tyzzerella 3	0.00599628	0	0	0	0.0258876	0	0
	Natribacillus	0.0300016	0	0.00088827	0.00037923	0	0	0
	Coriobacteriaceae UCG-002	0.00801845	0.000879215	0.000359204	0	0.0195058	0	0.00190949
	Clostridium sensu stricto 13	0	0	0	0	0	0.0299222	0.000381738
	Mogibacterium	0.00621672	0	0	0	0.00508764	0.0132436	0.0056665
	Lachnospiraceae UCG-006	0.00869279	0.00108613	0.0017587	0.000630875	0.0175671	0	0
	Moraxella	0.027454	0.000866915	0	0.00105146	0	0	0
	Hungatella	0.00178844	0	0.00812051	0.00886845	0.0070735	0.00274237	0
	Azospira	0	0	0	0.00258527	0.0231796	0.00194885	0
	Prevotella 9	0.0104146	0	0	0	0.0167343	0	0
	Mailhella	0.00402258	0	0	0	0	0.00221954	0.0205266
	Snodgrassella	0.00312717	0	0	0.00092331	0.0226589	0	0
	Adlercreutzia	0	0	0	0	0.0169639	0.00857709	0
	Christensenella	0	0.00135677	0.00640997	0.00430123	0.0131479	0	0
	Gordonibacter	0	0	0.00056573	0	0.00695598	0.0133583	0.00410371
	Pectobacterium	0.019003	0	0.00177654	0.00208577	0.00186087	0	0
	Brachybacterium	0.0247036	0	0	0	0	0	0
	Coprococcus 1	0.00834461	0	0.000390822	0	0.00642157	0.000587142	0.00848667
	Intestinibacter	0.00219414	0	0.000532962	0	0.00695714	0.00273999	0.0116404
	Flaviflexus	0.0217416	0.00213206	0	0	0	0	0
	Haliangium	0.00820544	0	0	0.00173885	0.0139143	0	0
	[Eubacterium] xylanophilum group	0	0	0	0	0	0.00409176	0.0193964
	Microvirga	0.00616804	0	0	0	0.0168385	0	0
	CAG-56	0	0	0	0	0.0140108	0.00178472	0.00689315
	Limnohabitans	0.00189356	0	0	0	0.0205465	0	0
	Nitrospira	0	0	0	0	0.0223622	0	0
	Nautella	0.00308402	0.004565	0.00811661	0.00634553	0	0	0
	Kocuria	0.0220732	0	0	0	0	0	0
	Cutibacterium	0.0114029	0	0	0.000758461	0.0082516	0	0.00163476
	Sanguibacter	0.0173459	0	0.00355308	0.00113769	0	0	0
	Vischeria sp. CAUP Q 202	0.00410272	0	0	0	0.0175786	0	0
	Bibersteinia	0.0204462	0	0.00074083	0	0	0	0
	Psychrobacillus	0.0207276	0	0	0	0	0	0
	Paraeggerthella	0	0	0	0	0	0.0204919	0
	Veillonellaceae UCG-001	0	0	0	0	0.0166863	0.00100849	0.00261751
	Brevundimonas	0.0111888	0.00214122	0	0	0.00683026	0	0
	Micromonospora	0	0	0	0.0053552	0.0144112	0	0
	[Eubacterium] eligens group	0.00631188	0	0	0	0.0114296	0.000991513	0.000976236
	Lachnospiraceae ND3007 group	0	0	0.000901846	0	0.00664597	0.00117371	0.0101395
	Bryobacter	0.0188206	0	0	0	0	0	0
	Brevibacterium	0.0110146	0	0	0	0.00745408	0	0
	Oribacterium	0.000631188	0	0	0.000553986	0.0172086	0	0
	metagenome	0	0	0	0	0	0.00457183	0.0133373
	Barnesiella	0	0	0	0	0	0.00305485	0.0148388
	Alteromonas	0.00714359	0	0	0	0.0106441	0	0
	Luteimonas	0.00796	0	0.000532962	0	0.0089449	0	0
	Diaphorobacter	0.00678485	0	0.00210431	0	0.00844465	0	0
	Geodermatophilus	0.0167265	0	0	0	0	0	0
	Allorhizobium-Neorhizobium-Pararhizobium-Rhizobium	0	0	0	0	0.0156684	0.000818353	0
	Gardnerella	0.0050495	0	0	0	0.0114279	0	0
	Acidipila	0.0164109	0	0	0	0	0	0
	Occallatibacter	0.0164109	0	0	0	0	0	0
	Mucinivorans	0.00220916	0	0	0	0.0139264	0	0
	Gemmatirosa	0.0157797	0	0	0	0	0	0
	Delftia	0.00246722	0.000527529	0	0	0.0126711	0	0
	gut metagenome	0	0	0.00130821	0.00353313	0.00276839	0.00583755	0.00210044
	Prevotellaceae UCG-004	0.000631188	0	0	0	0.00132919	0.0029932	0.0105843
	Fictibacillus	0.00555124	0	0	0	0.00993878	0	0
	Sphingobium	0	0	0	0	0.0154051	0	0
	Ralstonia	0.00639813	0	0	0	0.00881801	0	0
	Legionella	0.00252475	0	0	0	0.0124235	0	0
	Parvibacter	0.00219414	0	0	0	0	0	0.0124454
	Fibrobacter	0.00731379	0	0	0	0.00250669	0.00262327	0.00210387
	Pseudochrobactrum	0.00370083	0.00238402	0	0.00399554	0	0	0.00442418
	Enhydrobacter	0.00811914	0	0	0.000692113	0.00526997	0	0
	Alkalibacterium	0.0139401	0	0	0	0	0	0
	Tumebacillus	0.00347153	0	0	0	0.0104357	0	0
	Candidatus Arthromitus	0	0	0	0	0.00745408	0.00626276	0
	Acidothermus	0.0134348	0	0	0	0	0	0
	Succinivibrionaceae UCG-001	0	0	0	0	0.0134173	0	0
	Catabacter	0	0.00390923	0.00458997	0.00336954	0.00132919	0	0
	Bacteroidales bacterium Bact_22	0	0	0	0	0.00584659	0.00233132	0.00498508
	gut metagenome	0	0	0	0	0.00225871	0.00222385	0.00867941
	Cellvibrio	0	0	0	0	0.0129204	0	0
	U29-B03	0.000631188	0	0	0	0.0116689	0.000587142	0
	Nesterenkonia	0.0125919	0	0	0	0	0	0
	Marmoricola	0.0123936	0	0	0	0	0	0
	Actinobacillus	0.0123296	0	0	0	0	0	0
	Clostridiales bacterium enrichment culture clone 06-1235251-67	0	0	0	0	0.00402975	0	0.00823784
	Paeniglutamicibacter	0.0121299	0	0	0	0	0	0
	Salipaludibacillus	0.0112796	0	0	0.000758461	0	0	0
	Algoriella	0.0119175	0	0	0	0	0	0
	Phaseolus acutifolius (tepary bean)	0.0117193	0	0	0	0	0	0
	Luteibacter	0.010605	0	0.000532962	0.000568845	0	0	0
	Amphibacillus	0.0116534	0	0	0	0	0	0
	Aeriscardovia	0	0	0	0	0	0.0105196	0.00106459
	Rhodococcus	0.00565823	0.00192452	0	0	0.00397551	0	0
	Erysipelotrichaceae UCG-008	0	0	0	0	0	0.00359549	0.0078587
	Anaerofustis	0.00185041	0	0	0	0.00210271	0	0.00727709
	alphaI cluster	0.00126238	0	0	0	0.00993878	0	0
	Leucobacter	0.0109707	0	0	0	0	0	0
	Myroides	0.0109707	0	0	0	0	0	0
	RB41	0	0	0	0	0.0109327	0	0
	Atopobium	0.00126238	0	0	0	0.00496939	0.00241019	0.00216682
	Syntrophococcus	0	0	0	0.0017235	0.00434556	0.00443736	0
	Trueperella	0.00804517	0.00205276	0	0.00037923	0	0	0
	Shinella	0.00189356	0	0	0	0.00839055	0	0
	Humibacter	0.010099	0	0	0	0	0	0
	Prevotellaceae YAB2003 group	0	0	0	0	0.00993878	0	0
	Erysipelothrix	0.00992403	0	0	0	0	0	0
	Ruminococcaceae UCG-001	0	0	0	0	0.00659098	0	0.00283891
	Achromobacter	0.00146276	0	0	0	0.00795102	0	0
	Morganella	0.00928083	0	0	0	0	0	0
	Altererythrobacter	0	0	0	0	0.00745408	0	0.00171854
	Slackia	0	0	0	0.000676231	0.000531677	0.00557515	0.00234297
	Devosia	0.00883663	0	0	0	0	0	0
	Lachnoclostridium 1	0	0	0	0	0.00814837	0	0.000624762
	Aeromonas	0	0	0	0	0.00679552	0	0.00171854
	Methylocystis	0	0	0	0	0.00844796	0	0
	Nocardia	0.0050495	0	0	0.00336242	0	0	0
	Polymorphobacter	0.00470344	0	0	0.000630875	0.00298163	0	0
	Sphingopyxis	0	0	0	0	0.00808998	0	0
	Jeotgalibaca	0.00804517	0	0	0	0	0	0
	Kitasatospora	0.0079821	0	0	0	0	0	0
	Bartonella	0	0	0	0	0.00795102	0	0
	Alloprevotella	0	0	0	0	0.00732372	0	0.000400066
	Nordella	0	0	0	0	0.00745408	0	0
	Lachnospiraceae UCG-002	0	0	0	0	0.00101753	0.00638453	0
	Arcobacter	0.00731379	0	0	0	0	0	0
	Jatrophihabitans	0.00725866	0	0	0	0	0	0
	Pandoraea	0.00725866	0	0	0	0	0	0
	Sinomonas	0.00126238	0	0	0	0.00596327	0	0
	Oxalobacter	0	0	0	0	0.00431759	0.00190949	0.000833016
	Anaeromyxobacter	0	0	0	0	0.00695714	0	0
	Paenibacillus	0.00658241	0	0	0	0	0	0
	Erwinia	0.00658241	0	0	0	0	0	0
	Arsenophonus	0.00126238	0	0	0	0.00397551	0	0.00124952
	Fusobacterium	0.0036569	0	0.000377154	0	0.00239255	0	0
	Phormidium MBIC10003	0	0	0	0	0.00638013	0	0
	Pseudolabrys	0.00631188	0	0	0	0	0	0
	Alysiella	0.00623174	0	0	0	0	0	0
	Mycobacterium	0.00616804	0	0	0	0	0	0
	Azoarcus	0.00616804	0	0	0	0	0	0
	Hirschia	0.000631188	0	0	0	0.00546633	0	0
	Granulicella	0.000631188	0	0	0	0.00546633	0	0
	Catenulispora	0.00315594	0.002777	0	0	0	0	0
	probable genus 10	0	0	0	0	0.00184112	0.00197987	0.00210584
	Selenomonas 1	0	0	0	0	0.00248469	0.00327341	0
	Lachnoclostridium 5	0.00438827	0	0.00088827	0.000379143	0	0	0
	Pasteurella sp. 37234	0.00555124	0	0	0	0	0	0
	Sulfitobacter	0	0	0	0	0.00546633	0	0
	C1-B045	0.00246722	0	0	0	0.00298163	0	0
	Actinomyces	0	0	0	0.00166196	0.00374191	0	0
	Blastomonas	0.00536509	0	0	0	0	0	0
	Burkholderia-Caballeronia-Paraburkholderia	0.00536509	0	0	0	0	0	0
	Alloiococcus	0.00404455	0	0	0.00126175	0	0	0
	Microvirgula	0.00490519	0	0.00036705	0	0	0	0
	Ruminococcaceae UCG-007	0	0	0	0	0	0	0.00514621
	Lacticigenium	0.00511965	0	0	0	0	0	0
	Acidisphaera	0.0050495	0	0	0	0	0	0
	Amylibacter	0	0	0	0	0.00496939	0	0
	Methylobacterium	0	0	0	0	0.00491198	0	0
	Phreatobacter	0	0	0	0	0.00487724	0	0
	Fusibacter	0.00220916	0	0	0	0.00265839	0	0
	Phenylobacterium	0.00347153	0	0	0	0.00132919	0	0
	Flexilinea	0	0	0	0	0.00219271	0.00256255	0
	Fretibacterium	0	0	0	0	0.000863518	0.00109114	0.00263935
	Ruminobacter	0.000731379	0	0	0	0.00212671	0.00161359	0
	Yersinia	0	0	0	0	0.00425342	0	0
	Cohaesibacter	0	0.000570625	0.00360738	0	0	0	0
	Marinobacter	0.00415912	0	0	0	0	0	0
	metagenome	0	0	0	0	0	0.00411425	0
	Flexivirga	0.00410272	0	0	0	0	0	0
	Haemophilus	0.00410272	0	0	0	0	0	0
	Solobacterium	0	0	0	0	0.000531677	0.00178536	0.00173144
	Arthrobacter	0.00402258	0	0	0	0	0	0
	Oceanobacter	0.00402258	0	0	0	0	0	0
	Marinifilum	0	0	0	0	0.00398758	0	0
	Pseudoalteromonas	0.00398751	0	0	0	0	0	0
	Mucispirillum	0	0	0	0	0.00397551	0	0
	Reyranella	0	0	0	0	0.00397551	0	0
	Polynucleobacter	0	0	0	0	0.00397551	0	0
	Anaeroplasma	0	0	0	0	0.00298163	0.000816327	0
	Catenibacterium	0	0	0	0	0.00377915	0	0
	Ulvibacter	0.00370083	0	0	0	0	0	0
	Lachnospiraceae UCG-008	0	0	0	0	0.00265839	0	0.00100478
	Candidatus Alysiosphaera	0	0	0	0	0.00347857	0	0
	Iodidimonas	0	0	0	0	0.00347857	0	0
	Amycolatopsis	0.00347153	0	0	0	0	0	0
	Actinoallomurus	0.00347153	0	0	0	0	0	0
	Gaiella	0.00347153	0	0	0	0	0	0
	gut metagenome	0	0	0	0	0	0	0.00341862
	Desemzia	0.00329121	0	0	0	0	0	0
	Leifsonia	0.00315594	0	0	0	0	0	0
	Actinoplanes	0.00315594	0	0	0	0	0	0
	Acetoanaerobium	0.00308402	0	0	0	0	0	0
	metagenome	0	0	0	0	0.00297832	0	0
	Catenisphaera	0.000631188	0	0	0.0023006	0	0	0
	Sandaracinobacter	0.00185041	0	0.000977055	0	0	0	0
	Aerococcus	0.00279719	0	0	0	0	0	0
	Lawsonella	0	0	0	0	0.00265839	0	0
	Lachnospiraceae FE2018 group	0	0	0	0	0.00128919	0	0.00133894
	Prevotellaceae Ga6A1 group	0.00126238	0	0	0	0.00132919	0	0
	Providencia	0.00255983	0	0	0	0	0	0
	Dyella	0.00252475	0	0	0	0	0	0
	Lactococcus	0	0	0	0	0.00248469	0	0
	[Eubacterium] saphenum group	0	0	0	0	0.00248469	0	0
	Taibaiella	0	0	0	0	0.00248469	0	0
	Falsochrobactrum	0	0	0	0	0	0	0.00245214
	Roseitalea	0	0	0	0	0.00239255	0	0
	966-1	0	0	0	0	0.00239255	0	0
	S5-A14a	0.00111777	0	0.00124358	0	0	0	0
	Sharpea	0	0	0	0	0.00233179	0	0
	Quinella	0	0	0	0	0	0	0.00231539
	Kribbella	0.00220916	0	0	0	0	0	0
	Opitutus	0.00220916	0	0	0	0	0	0
	Oligella	0.00219414	0	0	0	0	0	0
	Harryflintia	0	0	0	0	0	0	0.00213899
	metagenome	0.00157797	0	0	0	0.000531677	0	0
	Paraprevotella	0	0	0	0	0.00198776	0	0
	Basfia	0	0	0	0	0	0	0.00195247
	Agromyces	0.00109707	0	0	0	0	0.000818353	0
	Paenochrobactrum	0	0	0	0	0	0	0.00190869
	Rothia	0.00189356	0	0	0	0	0	0
	Chitinophaga	0.00189356	0	0	0	0	0	0
	Aquicella	0.00189356	0	0	0	0	0	0
	Suttonella	0.00182845	0	0	0	0	0	0
	Lautropia	0	0	0	0	0.00159503	0	0
	Roseiarcus	0.00157797	0	0	0	0	0	0
	Candidatus Melainabacteria bacterium MEL.A1	0	0	0	0	0.00149082	0	0
	Shuttleworthia	0	0	0	0	0.00132919	0	0
	Frischella	0	0	0	0	0.00132919	0	0
	Dermacoccus	0.00126238	0	0	0	0	0	0
	metagenome	0.00126238	0	0	0	0	0	0
	Finegoldia	0	0	0.00052371	0.000692113	0	0	0
	Filifactor	0.00109707	0	0	0	0	0	0
	Peptostreptococcus	0.00109707	0	0	0	0	0	0
	Demetria	0.00109707	0	0	0	0	0	0
	Ruminococcaceae UCG-003	0	0	0	0	0.00106335	0	0
	Massilia	0	0	0	0	0.00106335	0	0
	Sphaerochaeta	0	0	0	0	0.00106335	0	0
	Marichromatium	0	0	0	0	0.000993878	0	0
	Lachnospiraceae UCG-003	0	0	0	0	0	0	0.000976236
	Rheinheimera	0.000946781	0	0	0	0	0	0
	Saccharospirillum	0.000946781	0	0	0	0	0	0
	p-1088-a5 gut group	0	0	0	0	0	0	0.000833016
	Aureimonas	0	0	0	0	0	0.000818353	0
	Burkholderiales bacterium Beta_02	0	0	0	0	0.000797516	0	0
	Pseudoxanthomonas	0.000631188	0	0	0	0	0	0
	Mycoplasma	0	0	0	0	0.000613708	0	0
	GWE2-31-10	0	0	0	0	0	0.000545569	0
	Corynebacterium	0.0004161	0	0	0	0	0	0
	Kaistia	0	0	0	0	0	0.000403397	0
	Candidatus Endomicrobium	0	0	0	0	0	0.000388553	0
	unidentified	6.0835	1.41345	2.19072	2.48634	8.68291	10.9677	17.2173
