# Supplementary material for: Distinct Stage Changes in Early-Life Colonization and Acquisition of the Gut Microbiota and Its Correlations With Volatile Fatty Acids in Goat Kids
Source: Front Microbiol. 2020 Oct 9;11:584742. doi: 10.3389/fmicb.2020.584742 (PMC7581860; doi:10.3389/fmicb.2020.584742)
Supplement: Supplementary file 1 [file Data_Sheet_1.ZIP › Supplementary_materials_0902/Table S5 The bacterial biomarkers in the fecal microbiota of 56-day-old kids and their mothers using LEfSe analysis.xlsx]

## Sheet: Sheet1
Table S5 The bacterial biomarkers in the fecal microbiota of 56-day-old goat kids and their mothers using LEfSe analysis
Biomarkers					Group	LDA value	P value
p_Fibrobacteres	c_Fibrobacteria	o_Fibrobacterales			F	3.06577	8.05451e-05
p_Fibrobacteres	c_Fibrobacteria	o_Fibrobacterales	f_Fibrobacteraceae		F	3.0657	8.05451e-05
p_Firmicutes	c_Clostridia	o_Clostridiales	f_Christensenellaceae	g_ChristensenellaceaeR_7group	F	3.60598	0.0250115
p_Firmicutes	c_Clostridia	o_Clostridiales	f_Ruminococcaceae	g_RuminococcaceaeUCG_002	F	3.1385	0.00555352
p_Firmicutes	c_Clostridia	o_Clostridiales	f_Ruminococcaceae	g_RuminococcaceaeUCG_010	F	3.50961	0.000228949
p_Firmicutes	c_Clostridia	o_Clostridiales	f_Ruminococcaceae	g_RuminococcaceaeUCG_013	F	3.01664	0.0135436
p_Spirochaetes	c_Spirochaetia				F	3.2276	0.000151074
p_Spirochaetes	c_Spirochaetia	o_Spirochaetales	f_Spirochaetaceae		F	3.2276	0.000151074
p_Firmicutes	c_Clostridia	o_Clostridiales	f_Christensenellaceae		F	3.61735	0.0250115
p_Verrucomicrobia					F	3.22375	0.00016564
p_Bacteroidetes	c_Bacteroidia	o_Bacteroidales	f_Rikenellaceae	g_RikenellaceaeRC9gutgroup	F	3.8982	0.00209141
p_Fibrobacteres					F	3.06581	8.05451e-05
p_Bacteroidetes	c_Bacteroidia	o_Bacteroidales	f_Prevotellaceae		F	3.07455	0.00209141
p_Spirochaetes	c_Spirochaetia	o_Spirochaetales	f_Spirochaetaceae	g_Treponema2	F	3.21549	0.000151074
p_Fibrobacteres	c_Fibrobacteria	o_Fibrobacterales	f_Fibrobacteraceae	g_Fibrobacter	F	3.06573	8.05451e-05
p_Verrucomicrobia	c_Verrucomicrobiae				F	3.22375	0.00016564
p_Spirochaetes	c_Spirochaetia	o_Spirochaetales			F	3.2276	0.000151074
p_Verrucomicrobia	c_Verrucomicrobiae	o_Verrucomicrobiales			F	3.22273	0.00016564
p_Firmicutes	c_Clostridia	o_Clostridiales	f_Ruminococcaceae		F	3.92159	0.0135436
p_Bacteroidetes	c_Bacteroidia	o_Bacteroidales			F	3.21998	0.00209141
p_Spirochaetes					F	3.2276	0.000151074
p_Bacteroidetes	c_Bacteroidia	o_Bacteroidales	f_Prevotellaceae	g_Prevotella	F	3.05974	0.000169439
p_Verrucomicrobia	c_Verrucomicrobiae	o_Verrucomicrobiales	f_Akkermansiaceae	g_Akkermansia	F	3.22273	0.00016564
p_Fibrobacteres	c_Fibrobacteria				F	3.06576	8.05451e-05
p_Verrucomicrobia	c_Verrucomicrobiae	o_Verrucomicrobiales	f_Akkermansiaceae		F	3.22273	0.00016564
p_Bacteroidetes	c_Bacteroidia	o_Bacteroidales	f_Rikenellaceae		F	3.91705	0.00161652
p_Firmicutes	c_Clostridia	o_Clostridiales	f_Ruminococcaceae	g_RuminococcaceaeNK4A214group	F	3.09465	0.00124275
p_Firmicutes	c_Clostridia	o_Clostridiales	f_Lachnospiraceae		D56	4.00198	0.010924
p_Proteobacteria					D56	3.87768	0.00209141
p_Bacteroidetes	c_Bacteroidia	o_Bacteroidales	f_Bacteroidaceae	g_Bacteroides	D56	3.86365	0.000722671
p_Bacteroidetes	c_Bacteroidia	o_Bacteroidales	f_Bacteroidaceae		D56	3.86365	0.000722671
p_Proteobacteria	c_Gammaproteobacteria				D56	3.83778	0.00555352
p_Proteobacteria	c_Gammaproteobacteria	o_Verrucomicrobiales	f_Enterobacteriaceae	g_Escherichia_Shigella	D56	3.76174	0.000169439
p_Proteobacteria	c_Gammaproteobacteria	o_Verrucomicrobiales			D56	3.7494	0.00095025
p_Proteobacteria	c_Gammaproteobacteria	o_Verrucomicrobiales	f_Enterobacteriaceae		D56	3.7494	0.00095025
p_Bacteroidetes	c_Bacteroidia	o_Bacteroidales	f_Muribaculaceae		D56	3.56749	0.0440827
p_Epsilonbacteraeota	c_Campylobacteria	o_Campylobacterales	f_Campylobacteraceae	g_Campylobacter	D56	3.47206	0.0135436
p_Epsilonbacteraeota	c_Campylobacteria	o_Campylobacterales	f_Campylobacteraceae		D56	3.47206	0.0135436
p_Epsilonbacteraeota					D56	3.46557	0.0303685
p_Epsilonbacteraeota	c_Campylobacteria	o_Campylobacterales			D56	3.46557	0.0303685
p_Epsilonbacteraeota	c_Campylobacteria				D56	3.46557	0.0303685
p_Bacteroidetes	c_Bacteroidia	o_Bacteroidales	f_Tannerellaceae	g_Parabacteroides	D56	3.25391	0.000160061
p_Bacteroidetes	c_Bacteroidia	o_Bacteroidales	f_Tannerellaceae		D56	3.25124	0.000168483
p_Proteobacteria	c_Deltaproteobacteria	o_Desulfovibrionales	f_Desulfovibrionaceae	g_Desulfovibrio	D56	3.23291	0.000169439
p_Firmicutes	c_Clostridia	o_Clostridiales	f_Lachnospiraceae	g_Blautia	D56	3.22526	0.00555352
p_Firmicutes	c_Clostridia	o_Clostridiales	f_Lachnospiraceae	g_Roseburia	D56	3.21139	0.00555352
p_Firmicutes	c_Clostridia	o_Clostridiales	f_Ruminococcaceae	g_Faecalibacterium	D56	3.19745	0.0167034
p_Proteobacteria	c_Deltaproteobacteria	o_Desulfovibrionales			D56	3.17026	0.00161652
p_Proteobacteria	c_Deltaproteobacteria	o_Desulfovibrionales	f_Desulfovibrionaceae		D56	3.17026	0.00161652
p_Proteobacteria	c_Deltaproteobacteria				D56	3.11142	0.010924
p_Firmicutes	c_Clostridia	o_Clostridiales	f_Lachnospiraceae	g_Ruminococcus_torquesgroup	D56	3.07379	0.00209141
Note: The significance level was LDA score > 3 and P < 0.05.
