# Supplementary material for: Distinct Stage Changes in Early-Life Colonization and Acquisition of the Gut Microbiota and Its Correlations With Volatile Fatty Acids in Goat Kids
Source: Front Microbiol. 2020 Oct 9;11:584742. doi: 10.3389/fmicb.2020.584742 (PMC7581860; doi:10.3389/fmicb.2020.584742)
Supplement: Supplementary file 1 [file Data_Sheet_1.ZIP › Supplementary_materials_0902/Table S6 The bacterial community composition in four body sites of the kids' mothers.xlsx]

## Sheet: List
Table S6 The bacterial community composition in four body sites of the kids' mothers
Table S6-1 The bacterial community composition at the phylum level in four body sites of the kids' mothers
Table S6-2 The bacterial community composition at the genus level in four body sites of the kids' mothers

## Sheet: Table S6-1
Table S6-1 The bacterial community composition at the phylum level in four body sites of the kids' mothers (%)
	Phylum	FE-M	MI-M	OC-M	VA-M
Top 10	Firmicutes	65.5311	48.2103	22.914	42.4452
	Bacteroidetes	23.6962	12.9305	42.6078	20.4191
	Proteobacteria	3.28112	15.0275	24.0568	9.70903
	Verrucomicrobia	1.81191	0.231926	0.0210078	0.386719
	Spirochaetes	1.77509	0.271379	1.49732	2.8748
	Actinobacteria	1.19876	8.82146	1.60939	10.6499
	Fibrobacteres	1.11663	0.275508	3.29724	0.198833
	Cyanobacteria	0.497784	7.39067	1.21057	6.75137
	Fusobacteria	0.308396	5.15567	1.83361	4.36791
	Epsilonbacteraeota	0.212094	0.251131	0.141994	1.20989
Others	Tenericutes	0.190563	0.180786	0.11737	0.428378
	Patescibacteria	0.0919416	0.0554678	0.402364	0.104934
	Chloroflexi	0.0742581	0.439072	0.0946703	0.219951
	Elusimicrobia	0.0676579	0.0411497	0.0664513	0.0258715
	Acidobacteria	0.0500609	0.340342	0.036454	0.0438639
	Kiritimatiellaeota	0.042719	0.0161906	0.0441371	0.0100392
	Planctomycetes	0.0201716	0.000948047	0	0.00435728
	Gemmatimonadetes	0.0150024	0.257148	0.00949866	0.0376524
	Nitrospirae	0.00825603	0.00985995	0.00255634	0.0079973
	Synergistetes	0.00390424	0.00899528	0.0285353	0.0171183
	WPS-2	0.00320612	0.0416456	0.00603047	0.0147803
	Lentisphaerae	0.00311672	0	0.00214843	0.0013678
	Rokubacteria	0	0.00189075	0	0.00330497
	Latescibacteria	0	0.00142789	0	0.00215865
	Deinococcus-Thermus	0	0.00321275	0	0.000968584
	Deferribacteres	0	0.00212659	0	0

## Sheet: Table S6-2 
Table S6-2 The bacterial community composition at the genus level in four body sites of the kids' mothers (%)
	Genus	FE-M	MI-M	OC-M	VA-M
TOP 20	Prevotella	1.20369	3.01606	21.8731	5.3583
	Ruminococcaceae UCG-005	15.464	2.7848	0.468752	1.49076
	Rikenellaceae RC9 gut group	9.63346	2.28473	4.10302	3.53605
	Christensenellaceae R-7 group	8.20711	2.8199	1.86353	2.63986
	Cetobacterium	0.272282	4.90923	0.267378	4.09776
	Bibersteinia	0.0854354	0.406831	7.70046	0.241544
	Blautia	0.593113	5.31099	0.278282	1.66694
	Cellulosimicrobium	0.199931	3.86874	0.188105	2.95152
	Bacteroides	1.44787	1.30077	0.508082	3.63585
	Ruminococcaceae NK4A214 group	2.17246	1.62737	1.2109	1.72961
	Ruminococcaceae UCG-010	4.10139	1.20926	0.402948	0.83427
	[Eubacterium] coprostanoligenes group	3.46209	1.54066	0.498654	0.999695
	Treponema	1.72373	0.255741	1.45032	2.86217
	Ruminococcaceae UCG-014	1.62158	1.46808	0.706512	1.51723
	Bifidobacterium	0.354353	2.35083	0.151862	2.23277
	Fibrobacter	1.11663	0.274968	3.29724	0.197921
	Faecalibacterium	0.332214	2.79597	0.229803	1.48399
	Streptococcus	0.101939	0.332253	1.0496	3.26035
	Ruminococcus	1.80856	1.92288	1.49176	2.14115
	Ruminococcaceae UCG-002	2.32302	0.719039	0.241743	0.416673
Others	Prevotellaceae UCG-003	0.868861	0.518147	1.37526	0.884279
	Defluviicoccus	0.172507	1.92987	0.157974	1.24654
	Lachnospiraceae NK4A136 group	0.782725	0.640946	0.27575	1.57645
	Moraxella	0.0883365	0.238877	2.69143	0.180254
	Ruminococcaceae UCG-013	2.06217	0.732556	0.0910771	0.30749
	Alistipes	1.84575	0.634514	0.109101	0.500287
	Clostridium sensu stricto 1	0.69923	1.01569	0.155602	1.06131
	Prevotellaceae UCG-001	0.405929	0.293123	1.5248	0.466751
	Ruminococcaceae UCG-011	0.208662	0.520886	0.900743	0.972135
	Corynebacterium 1	0.0333483	0.341368	0.186337	1.95801
	Akkermansia	1.80818	0.227183	0.0182799	0.373937
	Escherichia-Shigella	0.0713165	0.899798	0.131874	1.23271
	Mannheimia	0.0212343	0.15326	2.03271	0.0969354
	Lactobacillus	0.113631	1.07957	0.298326	0.801648
	Oscillibacter	1.6386	0.401359	0.0520954	0.14463
	Prevotellaceae NK3B31 group	0.0244854	0.102465	1.84215	0.250143
	Lachnospiraceae AC2044 group	0.628274	0.479555	0.50656	0.340617
	Holdemanella	0.099231	1.48706	0.0487544	0.303566
	Agathobacter	0.575656	0.732425	0.0750706	0.47865
	Fusobacterium	0.0331775	0.226466	1.2872	0.259321
	Phascolarctobacterium	1.24381	0.209157	0.0474655	0.14023
	Ruminococcaceae UCG-009	1.24528	0.268871	0.0455674	0.074865
	Subdoligranulum	0.13174	0.951763	0.071732	0.462176
	Lachnospiraceae XPB1014 group	0.143779	0.340017	0.773019	0.327021
	Dorea	0.203334	1.0051	0.0536487	0.316449
	Citrobacter	0.0294111	0.312194	0.934814	0.273866
	Bergeyella	0.0327147	0.0492736	1.36278	0.0569919
	Roseburia	0.315661	0.511603	0.101648	0.555568
	Saccharofermentans	0.140225	0.326618	0.544267	0.448499
	[Ruminococcus] torques group	0.109659	0.892217	0.0620129	0.361589
	[Eubacterium] hallii group	0.148406	0.845933	0.0698906	0.338115
	Succiniclasticum	0.0895381	0.184329	0.700779	0.366139
	Campylobacter	0.16852	0.0548997	0.0311068	1.05047
	Salinicoccus	0.0201205	0.169	0.299902	0.763273
	Acetobacter	0.0588598	0.206047	0.682838	0.249182
	Acinetobacter	0.0496265	0.240244	0.280761	0.616416
	Neisseria	0.0230824	0.0644345	1.01285	0.0764249
	Staphylococcus	0.0370295	0.409066	0.100067	0.600294
	Prevotella 6	0.0201819	0.026486	1.02392	0.0582491
	Lachnospiraceae NK3A20 group	0.0958694	0.181529	0.475252	0.330515
	Succinivibrio	0.785947	0.115757	0.0275725	0.110003
	Romboutsia	0.240826	0.344773	0.0963866	0.331776
	Desulfovibrio	0.19349	0.298759	0.104993	0.404813
	Family XIII AD3011 group	0.495472	0.203308	0.123485	0.174592
	SP3-e08	0.377477	0.273347	0.165349	0.141638
	Pseudomonas	0.0448939	0.299041	0.282549	0.309813
	Alysiella	0.0164713	0.0597278	0.798774	0.0606407
	Turicibacter	0.16792	0.183356	0.0728801	0.502664
	Bacillus	0.170282	0.407652	0.109136	0.238422
	Papillibacter	0.193161	0.160907	0.337606	0.215603
	CAG-352	0.0503821	0.168897	0.427204	0.218207
	Vibrio	0.0390869	0.571738	0.056605	0.184624
	Lachnoclostridium 10	0.292809	0.204915	0.227052	0.107843
	Butyrivibrio 2	0.0730008	0.128031	0.425552	0.20513
	Porphyromonas	0.0260898	0.0348351	0.679151	0.0886887
	Glutamicibacter	0.0238892	0.0198963	0.126999	0.648696
	Pasteurella sp. 37234	0.010958	0.0540983	0.717441	0.0218212
	Fusicatenibacter	0.0492062	0.484201	0.0258655	0.18461
	Lachnoclostridium	0.133548	0.21955	0.0206912	0.324484
	[Ruminococcus] gauvreauii group	0.0694687	0.368218	0.0716706	0.165741
	Coprococcus 2	0.1791	0.253868	0.0616929	0.177091
	Alcaligenes	0.0218559	0.122688	0.406638	0.118409
	Alloprevotella	0.0285582	0.0321854	0.507609	0.0809434
	Chujaibacter	0.00673051	0.62448	0.00690131	0.00487951
	Jeotgalicoccus	0.011659	0.073116	0.16085	0.394962
	dgA-11 gut group	0.443484	0.112068	0.00905337	0.0727373
	Pseudobutyrivibrio	0.0466773	0.130458	0.298259	0.160025
	Lachnospiraceae UCG-010	0.351539	0.135305	0.0451927	0.100171
	Ruminobacter	0.0433591	0.101507	0.359811	0.105862
	Sphingomonas	0.0355384	0.270445	0.20049	0.0855731
	Collinsella	0.0463525	0.312747	0.0176	0.188953
	Stenotrophomonas	0.0221911	0.447795	0.0470749	0.046991
	Garicola	0.0125547	0.094125	0.0756143	0.378336
	Thiobacillus	0.0916622	0.175858	0.197118	0.0899378
	Veillonella	0.0276472	0.0498976	0.382527	0.0774399
	[Eubacterium] ruminantium group	0.0938442	0.13742	0.168478	0.129582
	Succinivibrionaceae UCG-002	0.0272042	0.19361	0.116473	0.176985
	Erysipelotrichaceae UCG-003	0.042962	0.348569	0.0154455	0.0986504
	Candidatus Soleaferrea	0.326874	0.10301	0.0213578	0.0450321
	Prevotellaceae UCG-004	0.186231	0.111977	0.107901	0.0814884
	Tyzzerella 4	0.292301	0.147449	0.0151434	0.0270242
	Anaerovorax	0.0673926	0.114856	0.151998	0.140581
	Ruminiclostridium 1	0.27908	0.0943708	0.0424981	0.0532053
	Mycobacterium	0.015302	0.143029	0.0184566	0.291094
	Moryella	0.0558746	0.127141	0.117981	0.151609
	Anaerosporobacter	0.369004	0.0442252	0.0220698	0.0129841
	Rikenella	0.0215603	0.214887	0.0223243	0.181497
	Butyricicoccus	0.0319589	0.263923	0.00877135	0.132209
	Mailhella	0.256158	0.0831455	0.0366386	0.0549528
	Bacteroidales bacterium Bact_22	0.0186318	0.0575746	0.295923	0.0550229
	Atopostipes	0.0103206	0.0608855	0.140988	0.213632
	Tyzzerella 3	0.0260686	0.222868	0.0274258	0.132715
	Intrasporangium	0.102418	0.180906	0.0858405	0.0386762
	Ruminiclostridium 9	0.144869	0.105087	0.0249762	0.132603
	Enterococcus	0.0368131	0.103607	0.0582583	0.189158
	Aerococcus	0.00461314	0.0199068	0.0161354	0.344743
	Novosphingobium	0.0403597	0.192157	0.0379895	0.104249
	Psychrobacter	0.00263416	0.0234447	0.0770561	0.259953
	Lysobacter	0.0530644	0.162259	0.105358	0.041067
	Ruminiclostridium 6	0.0981115	0.114225	0.0871048	0.0620552
	Ruminococcaceae UCG-004	0.164821	0.0655708	0.0532039	0.0726837
	probable genus 10	0.0300395	0.0568597	0.188712	0.0781241
	Quinella	0.004166	0.0316418	0.260927	0.0472096
	Vischeria sp. CAUP Q 202	0.00785029	0.191609	0.00128947	0.137064
	Jeotgalibaca	0	0	0.00215975	0.323266
	Erysipelotrichaceae UCG-004	0.0378377	0.0887525	0.0604702	0.132793
	Paenibacillus	0.0587268	0.0792686	0.0569661	0.123725
	U29-B03	0.00931551	0.0476325	0.175715	0.0823971
	Veillonellaceae UCG-001	0.0231291	0.0323437	0.152895	0.104679
	Facklamia	0.00215522	0.0124107	0.0328361	0.265292
	Planococcus	0	0.00182279	0.0259763	0.280297
	Comamonas	0.00311309	0.0396096	0.195182	0.0663681
	Cutibacterium	0.0142542	0.191066	0.00194318	0.0969226
	Candidatus Saccharimonas	0.0894101	0.0313463	0.0946727	0.0792285
	Ureaplasma	0.00244308	0	0.00282048	0.281011
	Aquabacterium	0.0136736	0.0024988	0.0697175	0.200136
	Microvirgula	0.0082202	0.0211478	0.215645	0.038224
	Parabacteroides	0.025614	0.133331	0.00472622	0.115837
	Filifactor	0.017706	0.0216841	0.19479	0.032468
	Coprococcus 3	0.072658	0.0734333	0.0156384	0.095359
	Basfia	0.00240246	0.00425317	0.220757	0.0132098
	Lachnospiraceae FCS020 group	0.049726	0.0308482	0.071552	0.0852353
	Brevibacillus	0.0747432	0.0762533	0.0359489	0.0444536
	Kocuria	0.00388475	0.0485474	0.0195641	0.156626
	Marinilactibacillus	0.00194237	0.0320852	0.019133	0.175452
	Aliidiomarina	0	0.0464455	0.052127	0.12854
	Selenomonas 1	0.00454991	0.0610257	0.117744	0.0392431
	Lachnospiraceae ND3007 group	0.0142839	0.0789553	0.053302	0.0745116
	Peptococcus	0.0464021	0.0269234	0.110938	0.0340404
	Lachnospiraceae UCG-001	0.0615074	0.0278849	0.0101708	0.118635
	Marinospirillum	0.00134815	0.00713944	0.00285046	0.200204
	Ruminococcaceae V9D2013 group	0.0388109	0.0950391	0.0233672	0.0523424
	Stappia	0.0323074	0.120509	0.0123237	0.04424
	CAG-56	0.00829882	0.0358878	0.0298937	0.133318
	Brevundimonas	0.00807616	0.127078	0.0179623	0.0539997
	Leptotrichia	0	0.0101065	0.186633	0.00757649
	Erysipelotrichaceae UCG-009	0.0705093	0.0608311	0.0378545	0.0341628
	Anaerostipes	0.0101103	0.115277	0.0091386	0.0683804
	Family XIII UCG-001	0.116848	0.0419129	0.0167301	0.0270839
	Allorhizobium-Neorhizobium-Pararhizobium-Rhizobium	0.0244236	0.051623	0.0484447	0.0772023
	Anaerovibrio	0.0832319	0.0293473	0.0373235	0.0473244
	Acetitomaculum	0.0177157	0.027453	0.100327	0.0497472
	Enhydrobacter	0.00536057	0.125713	0.00619366	0.0576455
	Oribacterium	0.00617376	0.0358864	0.104197	0.04768
	Serratia	0.0118882	0.0855666	0.0144854	0.0801827
	Youngiibacter	0.0430818	0.0898849	0.0356365	0.0204609
	Intestinimonas	0.0954019	0.0441114	0.00555034	0.0403411
	[Eubacterium] xylanophilum group	0.0086582	0.0261308	0.0478762	0.100059
	Coprococcus 1	0.0252458	0.0671443	0.032965	0.0556768
	Defluviitaleaceae UCG-011	0.0871968	0.036702	0.032222	0.0244883
	Ruminiclostridium	0.0307071	0.0569904	0.0214798	0.0696467
	Paracoccus	0	0.0944273	0.0260763	0.0576879
	Marvinbryantia	0.0560135	0.0612779	0.0346087	0.0252282
	Elusimicrobium	0.0666964	0.0323467	0.0522045	0.0207861
	Ruminiclostridium 5	0.0701099	0.0670858	0.0108639	0.0230226
	Thioalkalispira	0.0347872	0.0639848	0.0493158	0.022786
	Oscillospira	0.027087	0.044744	0.079046	0.0191696
	[Eubacterium] nodatum group	0.0730654	0.0343647	0.038827	0.0221307
	Prevotella 9	0.00213552	0.122774	0.0106334	0.032566
	Brevibacterium	0.00119734	0.0292151	0.0506961	0.0851079
	Dubosiella	0.00240246	0.0991743	0.0102326	0.0538197
	Ornithinicoccus	0.0349691	0.0641014	0.033277	0.0328272
	Legionella	0.00945989	0.0854475	0.0105837	0.0586165
	Halomonas	0.00265653	0.0395581	0.0273433	0.0940945
	Peptostreptococcus	0.00927432	0.0152486	0.0984668	0.0378253
	[Eubacterium] brachy group	0.0680582	0.0384637	0.0256414	0.0280872
	Lachnospiraceae UCG-008	0.00500164	0.035665	0.062267	0.0523202
	[Ruminococcus] gnavus group	0.00736614	0.0758216	0.00218608	0.0696175
	Lachnospiraceae NK4B4 group	0.093764	0.0421743	0.00937457	0.00855003
	Methylobacterium	0.00640656	0.0372207	0.0734755	0.0366768
	Ochrobactrum	0.0109854	0.0842704	0.00809896	0.0461671
	Morganella	0.0038315	0.0107092	0.122614	0.00938149
	Sanguibacter	0	0	0.0064507	0.137399
	Geobacter	0.0279906	0.0732286	0.0234324	0.0190594
	Sphingobium	0.00834242	0.0882322	0.0374503	0.00953283
	Brachybacterium	0.000981287	0.00850635	0.011338	0.12198
	Lachnospiraceae UCG-007	0.120181	0.00641918	0	0.0148184
	Sulfurovum	0.0216374	0.0580346	0.0439296	0.0142889
	Sulfuricurvum	0.0138876	0.0748001	0.0367513	0.0116414
	Arcobacter	0	0.0141931	0.0289396	0.0935442
	Terrisporobacter	0.0166132	0.0359091	0.00781298	0.0748496
	Fusibacter	0.0233677	0.0663923	0.0266305	0.0170653
	Sutterella	0	0.033377	0.0287141	0.0712114
	Dialister	0.00549752	0.0699939	0.0277957	0.027058
	Massilia	0	0.0732645	0.0318211	0.0242751
	Clostridium sensu stricto 13	0.0327933	0.0575192	0.0146593	0.0209365
	Lautropia	0.00746422	0.00264308	0.104089	0.0109515
	Rhodanobacter	0.00502052	0.107639	0.000784277	0.0107924
	Phenylobacterium	0.0242636	0.0559876	0.0274289	0.0148403
	Lachnoclostridium 5	0.00784337	0.028428	0.0369379	0.0487592
	Prevotella 7	0.00240246	0.00121519	0.101176	0.0167397
	Lachnospiraceae UCG-006	0.00537539	0.02574	0.0512831	0.037553
	Natribacillus	0.00160164	0.0152671	0.00968323	0.0910309
	Snodgrassella	0.00573357	0.0783272	0.0115797	0.0215156
	gut metagenome	0.0404729	0.0312072	0.0153319	0.0300134
	Delftia	0.00621482	0.0468016	0.024993	0.0374044
	alphaI cluster	0.00523353	0.0742924	0.00154841	0.0339804
	Hydrogenoanaerobacterium	0.0743576	0.0136636	0	0.0262574
	Capnocytophaga	0.00957733	0.0244585	0.0734136	0.00667766
	Parvibacter	0.0701445	0.0288152	0.00436468	0.00992968
	Cellulosilyticum	0.0738713	0.0259961	0.00558813	0.00564803
	Faecalibaculum	0.0107694	0.0647158	0.00388636	0.0288175
	Leucobacter	0.00194237	0.00535458	0.0130646	0.0874447
	Blastomonas	0.00621482	0.0624584	0.00460924	0.0343834
	SR1 bacterium canine oral taxon 369	0	0.00121519	0.101685	0.00335924
	Lachnoclostridium 1	0.00449361	0.0233694	0.0549066	0.021585
	Mizugakiibacter	0.0044489	0.0917737	0.00285571	0.0033049
	Yaniella	0.00335256	0.0150877	0.0483771	0.0330292
	Haliangium	0.0206682	0.0481979	0.0233596	0.00761873
	[Eubacterium] eligens group	0.00797756	0.0685255	0.00699985	0.0160964
	Actinomyces	0.00727974	0.0112912	0.0633651	0.0167191
	Pseudoxanthomonas	0.0158457	0.0483897	0.0253285	0.00858588
	Shuttleworthia	0.0114593	0.00356972	0.043272	0.0392656
	Arenimonas	0.00661087	0.0472171	0.0285746	0.0115757
	[Anaerorhabdus] furcosa group	0.0361704	0.00851807	0.0188363	0.0286861
	Macellibacteroides	0.00858182	0.0451923	0.0278858	0.00939436
	Achromobacter	0	0.00843049	0.0615241	0.020607
	Flavihumibacter	0.0247001	0.0333781	0.0238945	0.00855979
	Gracilibacteria bacterium canine oral taxon 291	0	0	0.0878184	0.000809494
	Enterobacter	0	0.0284057	0.0178679	0.0416996
	Faecalitalea	0.0423308	0.0268541	0	0.0179946
	Shinella	0.00707259	0.0632967	0.00991282	0.00626462
	GCA-900066575	0.0518659	0.0191531	0.000545585	0.0144242
	Proteiniclasticum	0.0211063	0.0464007	0.0113904	0.00569999
	Ralstonia	0.00443355	0.0536313	0.00971591	0.0149792
	Lachnospiraceae UCG-002	0.0078912	0.00670052	0.0386129	0.0279392
	Caviibacter	0.00293634	0.00394938	0.0706762	0.00208821
	Geothrix	0.0128368	0.0432392	0.0180407	0.00549516
	Nesterenkonia	0.00613962	0.00789875	0.0121486	0.0533931
	Mucinivorans	0.00155526	0.0337524	0.00663882	0.0374913
	Psychrobacillus	0.00431044	0.00821036	0.046996	0.0194418
	Paeniclostridium	0.0253346	0.0130367	0.0129151	0.0276232
	Streptomyces	0.0199493	0.0348313	0.00722607	0.0165063
	Clostridium sensu stricto 6	0.0523963	0.0140814	0.000809907	0.00997314
	Helicobacter	0.00804897	0.039277	0.00126687	0.0284608
	Dietzia	0	0.0047597	0.012788	0.0595014
	Klebsiella	0	0.0254767	0.00680113	0.04454
	Prevotellaceae YAB2003 group	0.00194237	0.00436788	0.053756	0.0155747
	Atopobium	0.0114458	0.00995669	0.0252641	0.0267895
	Nitrosomonas	0.00364776	0.0197868	0.000784277	0.0491539
	Desulfoprunum	0.0126457	0.0342607	0.0182778	0.00698414
	Dechloromonas	0.00857048	0.025968	0.0301068	0.00666998
	Actinobacillus	0.000480751	0	0.0597901	0.0108721
	Azovibrio	0.00160164	0.00425317	0.0539769	0.0102878
	Flavonifractor	0.0186288	0.0317316	0.00156855	0.0175947
	Conchiformibius	0.001923	0.00345648	0.0568226	0.0064231
	Pygmaiobacter	0.0414654	0.019331	0.00109117	0.00632398
	Ruminococcaceae UCG-001	0.0131335	0.0204569	0.00692764	0.0276628
	Fonticella	0.0158109	0.0315671	0.0127698	0.00794683
	CL500-29 marine group	0	0.00617865	0	0.0617359
	Rhodococcus	0.00442519	0.0380105	0.00485795	0.0204851
	Flaviflexus	0	0	0.0134984	0.0534144
	Lachnospira	0.00326923	0.013412	0.00239623	0.0474882
	Rothia	0.00472396	0.0110606	0.0389217	0.0116467
	Prevotellaceae Ga6A1 group	0	0	0.0570225	0.00882741
	Devosia	0.00361533	0.0225757	0.0176584	0.0217413
	metagenome	0.0159631	0.0318201	0.00557191	0.0115929
	Rheinheimera	0.00606874	0.039565	0.00780319	0.0108211
	Parvimonas	0.0053388	0.00664563	0.0398621	0.0115374
	DNF00809	0.0135204	0.0179362	0.0103464	0.0211531
	Desulfocapsa	0.0230589	0.0109025	0.0168797	0.0117174
	Erysipelatoclostridium	0	0.0182937	0	0.0437048
	Enteractinococcus	0	0	0.00215975	0.0595288
	[Eubacterium] ventriosum group	0.0246414	0.0164583	0.0111895	0.0090875
	Gemmatimonas	0	0.0561194	0	0.00364747
	Rathayibacter	0	0.00546837	0.0476364	0.00647138
	Providencia	0	0	0.0533256	0.00454668
	GWE2-31-10	0.0501655	0.00321275	0	0.00276195
	Ruminococcaceae UCG-003	0.00402367	0.0102471	0.0140635	0.0278041
	Limnohabitans	0	0.0326803	0	0.0226599
	Chryseobacterium	0.00480492	0.00887856	0.0282271	0.0128658
	Fretibacterium	0.00341864	0.00899528	0.0271075	0.0145202
	Amphibacillus	0	0.00564313	0.00859629	0.0374396
	Olsenella	0.00311309	0.0123352	0.00861026	0.0258015
	Barnesiella	0.00251479	0.00826067	0.00459639	0.0344089
	Alteromonas	0.000981287	0.0306358	0.00170028	0.015833
	Johnsonella	0.0040041	0.00607596	0.0299138	0.00909517
	Phaseolus acutifolius (tepary bean)	0.00119734	0.0117775	0.0334213	0.00182374
	Allocatelliglobosispora	0.0193403	0.00916994	0.013811	0.00574611
	F0058	0.00247891	0.00212659	0.0391934	0.00409701
	Mogibacterium	0.00724053	0.0103758	0.00581581	0.0244149
	Occallatibacter	0.00216338	0.045337	0	0
	Kluyvera	0.00302425	0	0.0131536	0.0302211
	Suttonella	0.000478938	0.00178486	0.0355689	0.008116
	Acidibacter	0	0.0457699	0	0
	Proteiniphilum	0.00790119	0.0178378	0.0102633	0.00954765
	GCA-900066225	0.00828395	0.0159072	0	0.0213431
	Rhodobacter	0.00176415	0.0125436	0.00558635	0.0239613
	gut metagenome	0.0183344	0.0227625	0	0.00262337
	Sediminispirochaeta	0.00120188	0.00927965	0.0259799	0.00684923
	Sphingosinicella	0.00416088	0.02213	0.0104951	0.0055385
	Senegalimassilia	0.00179398	0.0227291	0.000971591	0.0167805
	Yersinia	0	0.0244619	0.00655824	0.01083
	Methylocystis	0.00835966	0.0125302	0.00752426	0.0134151
	Negativibacillus	0.0228306	0.0137834	0	0.00478038
	Ruminococcaceae UCG-008	0.0282117	0.00973423	0	0.00295237
	Micromonospora	0.00791709	0.014122	0.00361295	0.0150564
	FD2005	0	0.0109598	0.0278301	0.00182712
	Diaphorobacter	0	0.0316855	0.0059916	0.00292287
	Oceanisphaera	0.000957875	0.00182279	0	0.0378079
	Desulfobulbus	0	0	0.0308552	0.0096171
	Acidipila	0.00654191	0.0335773	0	0
	Tepidibacillus sp. Z9_2	0	0.0263697	0.00913497	0.0043725
	966-1	0	0.0199416	0.00536534	0.0143767
	Lawsonella	0.000981287	0.0294995	0	0.00915817
	Alkalibacterium	0	0.00182279	0.0217765	0.015408
	Erysipelotrichaceae UCG-008	0.0143464	0	0.0126792	0.0114918
	Aliicoccus	0.000718406	0.00650135	0.0147879	0.0163635
	Anaerofustis	0.00906879	0.00847632	0.0107047	0.00999056
	Sedimentibacter	0.00286061	0.0220679	0.00919046	0.004081
	Ciceribacter	0.00911003	0.0150316	0.0095981	0.00350781
	Tyzzerella	0.018819	0.0146589	0.000818377	0.0023104
	Aeromonas	0	0.0184684	0.00343819	0.0140751
	Leifsonia	0	0.0244097	0	0.0110419
	Prevotella 2	0.00163548	0.0312113	0	0.00250764
	metagenome	0.0026694	0.0191519	0	0.013531
	Fournierella	0.00178617	0.0261454	0	0.00709459
	Desemzia	0	0	0	0.034706
	Marinifilum	0.00364077	0.0187414	0.00977687	0.002332
	Hydrogenophaga	0.00895493	0.0155207	0.00963866	0
	Burkholderiales bacterium Beta_02	0.00199816	0.0112608	0.00603047	0.0147803
	Bartonella	0	0.0252521	0	0.00867835
	Sporacetigenium	0.00893823	0.0164133	0.00664361	0.00188882
	Azoarcus	0.00511273	0.014048	0.0111017	0.00339733
	Tannerella	0.00213552	0.000911394	0.0275201	0.00308916
	Bavariicoccus	0.0026694	0.00273418	0.0153552	0.012812
	Anaeromyxobacter	0.00267077	0.0175738	0.00423644	0.00873004
	Pedobacter	0.00560574	0.00696728	0.0150089	0.00559605
	Acidothermus	0	0.0321515	0	0.00101763
	Lactococcus	0.00206656	0.0221971	0	0.0087447
	Bilophila	0	0.0153355	0.0051279	0.0123095
	Bradyrhizobium	0.00388475	0.0192159	0.00291477	0.00647595
	Sporosarcina	0.00106776	0.00303798	0.0065868	0.0215981
	Marinobacter	0	0.0193173	0.00814927	0.00456157
	TM7 phylum sp. oral clone FR058	0.00156033	0.00216085	0.0269497	0.000882254
	Dongia	0.00564103	0.0159371	0.00586503	0.004081
	Polyangium	0.0037455	0.0170584	0.010277	0
	Tissierella	0.00827514	0.00212659	0.00661312	0.0134293
	[Desulfobacterium] catecholicum group	0.00201617	0.0159704	0.0102656	0.0020405
	Chelativorans	0.00854208	0.00972154	0.00412926	0.00775088
	Parasutterella	0	0.0208289	0	0.009292
	Odoribacter	0	0.0120613	0.000784277	0.0169973
	Proteus	0.00072839	0.0108983	0.0139345	0.00422192
	[Bacteroides] pectinophilus group	0.0052183	0.00189609	0.00576885	0.0168876
	Jatrophihabitans	0	0.0297514	0	0
	Jonesia	0.00258293	0.0269766	0	0
	Falsochrobactrum	0.00160164	0.00303798	0.0191494	0.00571296
	Ureibacillus	0.00587268	0.0115443	0.00461506	0.00729494
	Trichococcus	0.0138622	0.0114959	0.00190955	0.00203525
	Acidovorax	0	0.00902099	0.0123878	0.00740335
	Lysinibacillus	0.00480492	0.00577216	0.00394125	0.0142651
	Paeniglutamicibacter	0	0	0	0.0287265
	metagenome	0.0255749	0.00212659	0.000951905	0
	Corynebacterium	0	0.00321275	0.0143049	0.0100965
	Luteimonas	0.00121398	0.0123476	0.00870494	0.00527323
	hgcI clade	0	0	0	0.0274325
	Paraprevotella	0.00130838	0.0197731	0.00155796	0.00454668
	Gemmatirosa	0.001923	0.0251829	0	0
	Erysipelothrix	0	0.00273418	0.00696356	0.017281
	Nocardioides	0	0.0147465	0.0068599	0.00458713
	Candidatus Endomicrobium	0.000961501	0.00565869	0.0142469	0.00508535
	Ornithinimicrobium	0	0.00856047	0.00145739	0.0157444
	Syntrophococcus	0.00100592	0.00333106	0.00710601	0.0137706
	Trueperella	0	0	0	0.0252106
	Pseudochrobactrum	0.00240246	0	0.0173982	0.00533811
	BD1-7 clade	0.00303437	0.0142866	0.00345795	0.0043173
	Gaiella	0	0.0197412	0	0.00532721
	Anaeroplasma	0	0.00669776	0.00768797	0.0100691
	metagenome	0	0.0160805	0.00114957	0.0069797
	Butyrivibrio	0.0177788	0.00562977	0	0.000649526
	Bryobacter	0.00196257	0.0217265	0	0
	Hirschia	0.00163548	0.0114026	0	0.0106285
	Thermomonas	0.00221284	0.0146489	0.00666068	0
	Bosea	0	0.0177073	0.00182998	0.00389715
	UBA1819	0.00052011	0.00810593	0	0.0145971
	Anaerotruncus	0	0.0117782	0	0.0112384
	Sphingopyxis	0.00264356	0.0114524	0.00291477	0.0058739
	Gardnerella	0	0.0121565	0	0.0105465
	Solobacterium	0.00731783	0.00272712	0.0069678	0.00563653
	XBB1006	0.00240246	0.00273418	0.0112795	0.00617986
	Weissella	0.00179615	0.00874893	0.00232144	0.00968898
	MND1	0.00240246	0.0157568	0.00406948	0
	Intestinibacter	0.00737283	0	0	0.014789
	Marichromatium	0	0.0203367	0	0.00162381
	Marmoricola	0.00697877	0	0.0119543	0.00259742
	C1-B045	0	0	0.00232105	0.019161
	Sulfurimonas	0	0.0099268	0	0.0114863
	Syntrophorhabdus	0.00888773	0.00841067	0.00206454	0.0020405
	Caproiciproducens	0.00346365	0.001389	0.00801562	0.00822355
	Pedomicrobium	0.00194237	0.00845554	0.00840155	0.00188882
	Thauera	0	0.0155063	0.00505054	0
	Sphaerochaeta	0	0.00142207	0.0166731	0.0024329
	Phreatobacter	0	0.00895495	0.0020914	0.00937468
	Thioclava	0.00277223	0.0134368	0.00361139	0
	Aureimonas	0	0.00754921	0.0117151	0.000455934
	Agromyces	0.00100808	0	0.00218608	0.01629
	Porphyrobacter	0	0	0	0.0193623
	Limnobacter	0.00208044	0.010872	0.00638505	0
	Soehngenia	0.00231639	0.011199	0.00369991	0.0020405
	Pseudolabrys	0	0.0133321	0	0.00569404
	OLB8	0.00395147	0.00212659	0	0.0128214
	Ruminococcaceae UCG-007	0.0040041	0.0148712	0	0
	Enterorhabdus	0.0129087	0.00410337	0.00176853	0
	Angelakisella	0.01381	0.00397415	0	0.000929431
	Pseudoalteromonas	0	0.00182279	0.00394125	0.0126733
	Sideroxydans	0.00686901	0	0.00309473	0.00809494
	Curvibacter	0.00923581	0.00356972	0.00515788	0
	Saccharopolyspora	0	0.00428366	0.00190955	0.0116998
	Georgenia	0.00588772	0.00298681	0.00712322	0.00188882
	metagenome	0.00598127	0	0.00767228	0.004081
	Kitasatospora	0	0.00790053	0	0.0096282
	Holdemania	0	0.0120565	0.00154841	0.00383807
	Propionibacterium	0	0	0.0139168	0.00324763
	Algoriphagus	0.00675226	0	0.00496571	0.00519138
	gut metagenome	0.00427515	0.0124844	0	0
	Acidisphaera	0	0.0165649	0	0
	Anaerofilum	0.00373458	0.00230604	0.0087999	0.00160455
	Faecalicoccus	0	0.0029627	0	0.0134697
	Rummeliibacillus	0	0	0.00594327	0.0103912
	Epulopiscium	0	0.0117365	0	0.00452197
	Granulicatella	0	0	0.0161058	0
	Micrococcus	0	0.0112331	0	0.00487016
	Nitrospira	0.00402527	0.00514272	0	0.00637348
	Roseitalea	0	0.015429	0	0
	Microbacterium	0	0	0.0111733	0.00389613
	Dinoroseobacter	0	0.00889846	0	0.00609729
	Howardella	0.000957875	0.00922549	0.00156567	0.00312456
	Saccharibacillus	0	0.0148684	0	0
	[Eubacterium] saphenum group	0.000718406	0	0.00657967	0.00744466
	MSBL7	0.00447484	0.00502584	0.00246575	0.00269831
	Clostridium sensu stricto 7	0.0066735	0.00455697	0.00340057	0
	Candidatus Arthromitus	0	0.00185201	0	0.0127235
	Prevotella	0	0	0.0145639	0
	Sandaracinus	0	0.00474024	0.00269382	0.00700157
	Pleomorphomonas	0	0.00966969	0.00467111	0
	Geodermatophilus	0	0.0143197	0	0
	Sellimonas	0	0.00903912	0	0.00516824
	metagenome	0	0.0140988	0	0
	Nannocystis	0	0.00212659	0.0106001	0.00134916
	Humibacter	0	0.0138259	0	0
	Tepidimonas	0	0.00407097	0	0.00965987
	Anaerocolumna	0.0040041	0.00577216	0	0.00387544
	Ramlibacter	0	0.00212659	0.0114126	0
	unidentified rumen bacterium RF39	0.00407097	0.00929325	0	0
	Petrimonas	0.00052011	0.00151899	0.00947975	0.00171083
	Sandaracinobacter	0	0.00749641	0	0.00548126
	Desulfuromonas	0.00348545	0.00245441	0.00447421	0.002332
	Pseudoflavonifractor	0.00408638	0	0.00377956	0.00485696
	Oceanobacter	0	0	0	0.0127205
	BSV13	0.00295968	0.00258432	0.0065241	0.000583
	Tumebacillus	0	0.00189609	0	0.0107172
	Anoxybacillus	0	0.00885646	0	0.0036219
	Desulfitobacterium	0	0.0120604	0	0
	Candidatus Alysiosphaera	0.00249645	0.00371354	0	0.0058115
	Dielma	0.00402281	0.00461075	0.00242666	0.000929431
	Dechlorosoma	0	0.00121519	0.0104981	0
	p-1088-a5 gut group	0.0107736	0	0	0.000911868
	metagenome	0.00448279	0.00474024	0	0.00242848
	[Eubacterium] oxidoreducens group	0.0057507	0.00433995	0.00130713	0
	Garciella	0.00320328	0.00394938	0.000971591	0.00319154
	Raoultibacter	0	0	0.00221703	0.00909336
	Denitratisoma	0	0.0112952	0	0
	Paenalcaligenes	0	0	0	0.0111989
	Butyricimonas	0	0.0111552	0	0
	Pectobacterium	0	0	0.00450495	0.00647595
	Nocardia	0	0.0109533	0	0
	Pajaroellobacter	0	0.0109533	0	0
	Hyphomicrobium	0	0	0.00453903	0.00640654
	Selenomonas 3	0	0.00272712	0	0.008162
	Roseomonas	0.000718406	0	0.00145739	0.00848021
	Viridibacillus	0.00143681	0	0.00919588	0
	Azospirillum	0.00156033	0.00270107	0.00441245	0.00188882
	metagenome	0	0.00550263	0.000485795	0.00454668
	Smithella	0.00364077	0	0.00381909	0.002915
	Pandoraea	0	0.0103694	0	0
	Kaistia	0	0.000607596	0.00816089	0.00153526
	Oceanobacillus	0	0	0.0043195	0.00576654
	Clostridium sensu stricto 2	0	0.00321275	0	0.00678417
	Phormidium MBIC10003	0.000756064	0.00142207	0	0.00774867
	Nonomuraea	0.00320328	0.00394938	0	0.0027356
	LD29	0	0.00216085	0	0.00770032
	Chelatococcus	0.00254868	0.00662091	0	0.000683901
	Sphingobacterium	0	0.00334178	0.00558665	0.000911868
	Clostridium sensu stricto 5	0.00260055	0.0043073	0.00287568	0
	Clostridium sensu stricto 8	0.00347022	0.00516457	0	0.00113983
	Iodidimonas	0	0.00354934	0.00154736	0.00454668
	S5-A14a	0	0.00121519	0.00827095	0
	Finegoldia	0	0.0043949	0.00130713	0.00374227
	Cerasicoccus	0.00373716	0.000607596	0	0.00508113
	CPla-4 termite group	0.00939795	0	0	0
	Pseudactinotalea	0	0	0	0.00937742
	Hafnia-Obesumbacterium	0	0	0.00933988	0
	Helcococcus	0	0.000607596	0.00692215	0.00176451
	SWB02	0	0.00269625	0	0.00651004
	KCM-B-112	0.000971187	0	0	0.00811907
	hoa5-07d05 gut group	0.00847283	0	0.000475952	0
	Schwartzia	0.00701452	0.000545424	0	0.00135683
	Skermanella	0	0.00527945	0	0.003544
	Alloiococcus	0	0.00142789	0	0.00730274
	Aquamicrobium	0	0.00243096	0.00434755	0.00193717
	Algoriella	0	0.00212659	0.00458947	0.00194806
	Desulfotomaculum	0.00347022	0.00273418	0.00145739	0.000911868
	Pantoea	0	0.00364558	0	0.00485696
	Granulicella	0	0.00395027	0	0.00454668
	Microvirga	0.0029577	0.0021817	0	0.00324763
	Gordonia	0.000971187	0	0.00118988	0.00616998
	Gilliamella	0	0.008297	0	0
	Chitinophaga	0	0.00827119	0	0
	Erwinia	0	0.00820255	0	0
	Hymenobacter	0	0.00243038	0.00218608	0.00357457
	Dyadobacter	0	0	0.00728693	0.000882254
	Kurthia	0	0.00622831	0	0.00193717
	Paraclostridium	0.00347022	0.00303798	0	0.00159577
	Lachnospiraceae UCG-004	0	0	0	0.00794029
	Brochothrix	0	0.00303798	0	0.00487016
	Catenulispora	0	0.00790053	0	0
	Haemophilus	0	0.00622996	0.00154736	0
	Sulfuricella	0	0.00284414	0.00489999	0
	Ottowia	0.00523353	0	0	0.00242146
	Anaerobium	0	0.00433473	0.0010457	0.00227334
	Nautella	0	0.00531564	0	0.00227967
	unidentified rumen bacterium RFP12	0.00756886	0	0	0
	Flexivirga	0	0.00752056	0	0
	Arsenophonus	0.000485594	0.00379665	0.000774204	0.00244471
	Sulfurifustis	0.00072839	0.00559476	0.00117541	0
	Pseudoduganella	0	0.00521426	0	0.00227334
	Myroides	0	0	0	0.0073754
	Flavobacterium	0	0.00460175	0.00188978	0.000882254
	Woeseia	0	0.0071982	0	0
	metagenome	0.00708972	0	0	0
	Agrococcus	0	0	0	0.00703928
	Oligoflexus	0	0.00162064	0	0.00533423
	Clostridium sensu stricto 12	0.00052011	0.00216085	0.00261426	0.00161899
	Longilinea	0	0.00354526	0	0.00334632
	Lacticigenium	0	0.000911394	0.00323963	0.00271367
	Gordonibacter	0.00683255	0	0	0
	Selenomonas	0	0	0.00170028	0.00508813
	Cyanobium PCC-6307	0	0.00270107	0	0.0040705
	Dermacoccus	0	0.00434525	0	0.00232358
	Acetivibrio	0.00294386	0	0	0.00350781
	Candidatus Stoquefichus	0	0.00365237	0	0.0027356
	Arthrobacter	0	0.00637976	0	0
	Vagococcus	0	0	0.00145739	0.00487144
	Exiguobacterium	0	0.00444405	0	0.00182374
	Virgisporangium	0	0	0.00218608	0.00404747
	Saccharospirillum	0	0.00364615	0	0.00253568
	Ercella	0.00100808	0.0043073	0.000818377	0
	Nocardiopsis	0	0.000911394	0	0.00519484
	Cellvibrio	0	0	0	0.00593629
	[Eubacterium] fissicatena group	0	0	0	0.00592604
	Succinivibrionaceae UCG-001	0	0	0	0.00584573
	Rhodopseudomonas	0.00201617	0	0.00380843	0
	Janthinobacterium	0	0.00121519	0	0.00455934
	Desulforhabdus	0	0	0.00386841	0.00188882
	Cloacibacterium	0	0.0024988	0	0.00323797
	Lachnospiraceae FE2018 group	0.000478938	0	0.00327229	0.0019508
	Gemmobacter	0	0	0.00340057	0.00227334
	Alsobacter	0	0	0	0.00566846
	Rhodovulum	0	0.00562215	0	0
	Megamonas	0	0	0	0.00552042
	Pediococcus	0.00186858	0.00121519	0.00170028	0.000683901
	Burkholderia-Caballeronia-Paraburkholderia	0	0.00543162	0	0
	Dyella	0	0.00543162	0	0
	Roseiarcus	0	0.00543162	0	0
	Reyranella	0	0.00543162	0	0
	Kandleria	0	0	0.00539863	0
	Kribbella	0	0.00154887	0	0.0038231
	Caldicoprobacter	0.00367532	0	0	0.00159577
	Ruminococcaceae UCG-012	0	0.00324128	0.00103227	0.0008745
	Mycoplasma	0	0.00148135	0	0.00364639
	GKS98 freshwater group	0	0	0.00373672	0.00129871
	Brooklawnia	0	0	0.00335262	0.00161899
	Proteocatella	0	0.00178486	0.00317982	0
	[Cytophaga] xylanolytica group	0.00176415	0	0.00128947	0.00188882
	Actinoallomurus	0	0.00493783	0	0
	Clostridium sensu stricto 10	0	0.00142789	0	0.00350781
	Catenibacterium	0	0	0	0.00487016
	Clostridioides	0	0	0	0.00474892
	Eisenbergiella	0.00470777	0	0	0
	Ulvibacter	0	0.0024988	0.00134984	0.000809494
	Nitratireductor	0.00201617	0	0.00257894	0
	Gulosibacter	0	0	0	0.00454591
	Acholeplasma	0	0	0.000971591	0.00357145
	Taibaiella	0	0	0	0.00452474
	Silanimonas	0	0.00142789	0	0.00305288
	Aquicella	0	0.00444405	0	0
	Iamia	0	0.00121519	0	0.00319154
	SH-PL14	0	0.000948047	0	0.00344541
	Coprobacter	0	0	0	0.00438845
	Xylophilus	0.00240246	0	0.00194318	0
	Oxalobacter	0	0	0.00190955	0.00242848
	Desulfosporosinus	0	0.00433734	0	0
	Mangrovibacter	0	0.00107092	0	0.00324677
	Altererythrobacter	0	0.00212659	0.00218608	0
	Candidatus Captivus	0.00052011	0.00266233	0.00109117	0
	metagenome	0	0.00231501	0	0.00194806
	Blastococcus	0	0	0	0.00422081
	Sinomonas	0	0	0.000950155	0.00324763
	[Clostridium] innocuum group	0.00106776	0	0	0.00312654
	Parasegetibacter	0.00176415	0	0	0.00242848
	Deinococcus	0	0.00321275	0	0.000968584
	Hungatella	0	0.00413033	0	0
	Parapusillimonas	0	0.00214183	0.00188978	0
	Defluviitalea	0.0013347	0.00151899	0	0.00113983
	Candidatus Solibacter	0	0	0.00103158	0.00292287
	Peredibacter	0	0.000987567	0	0.00269831
	Lachnospiraceae UCG-009	0	0	0	0.00363627
	metagenome	0	0.00142789	0	0.00215865
	Demetria	0	0	0	0.00357145
	Dysgonomonas	0	0	0.0035096	0
	Breznakia	0.00100592	0.00151899	0	0.000974032
	Adlercreutzia	0	0	0	0.003498
	Eggerthella	0	0	0.00170028	0.00161899
	Gracilibacter	0	0.00327255	0	0
	Salipaludibacillus	0	0	0	0.00324677
	metagenome	0	0.00189075	0	0.00129905
	Synergistes	0.000485594	0	0	0.0025981
	Sulfitobacter	0.00100592	0.00206517	0	0
	Actinoplanes	0	0.00303798	0	0
	Frischella	0	0.00182279	0	0.00117634
	Candidatus Melainabacteria bacterium MEL.A1	0	0.00297117	0	0
	WCHB1-32	0	0	0	0.00296814
	Paenochrobactrum	0	0	0.00269969	0
	Sphaerisporangium	0	0.00121519	0.00145739	0
	Propionivibrio	0	0.00162064	0.0010457	0
	Acetoanaerobium	0	0	0	0.00259742
	Oligella	0	0	0	0.00259742
	CI75cm.2.12	0.000971187	0	0	0.00161899
	RB41	0	0	0	0.00250764
	Flexilinea	0	0	0	0.00250764
	Pseudoclavibacter	0	0	0.00248456	0
	Lachnospiraceae UCG-003	0	0.00243096	0	0
	Amylibacter	0	0	0	0.00242146
	Mucispirillum	0	0.00212659	0	0
	Amycolatopsis	0	0.00197513	0	0
	Opitutus	0	0.00197513	0	0
	Rhodoplanes	0	0	0	0.00193717
	Aeribacillus	0	0.00189075	0	0
	Polynucleobacter	0	0	0	0.00188882
	Sphingoaurantiacus	0	0	0.00163675	0
	Azospirillum sp. 47_25	0	0	0	0.00161899
	Pyramidobacter	0	0	0.00142786	0
	Enorma	0	0.00107092	0	0
	Sharpea	0	0	0	0.000882254
	Lachnospiraceae NC2004 group	0	0	0.000818377	0
	Coriobacteriaceae UCG-002	0	0.00081032	0	0
	Allobaculum	0	0	0	0.000683901
	Megasphaera	0	0	0	0.000678417
	Asteroleplasma	0	0	0.000522851	0
	unidentified	15.6379	18.8001	12.1956	15.8672
