# Supplementary material for: Distinct Stage Changes in Early-Life Colonization and Acquisition of the Gut Microbiota and Its Correlations With Volatile Fatty Acids in Goat Kids
Source: Front Microbiol. 2020 Oct 9;11:584742. doi: 10.3389/fmicb.2020.584742 (PMC7581860; doi:10.3389/fmicb.2020.584742)
Supplement: Supplementary file 1 [file Data_Sheet_1.ZIP › Supplementary_materials_0902/Table S7 The bacterial community composition in the rumen of 56-day-old kids and their mothers.xlsx]

## Sheet: List
Table S7. The bacterial community composition in the rumen of 56-day-old kids and their mothers
Table S7-1. The bacterial community composition at the phylum level in the rumen of 56-day-old kids and their mothers
Table S7-2. The bacterial community composition at the genus level in the rumen of 56-day-old kids and their mothers

## Sheet: Table S7-1
Table S7-1. The bacterial community composition at the phylum level in the rumen of 56-day-old kids and their mothers (%)
	Phylum	RU-M	RU-D56
Top3	Bacteroidetes	52.4393	47.8962
	Firmicutes	42.1436	47.0316
	Proteobacteria	3.15418	2.56233
Others	Actinobacteria	0.53654	0.29306
	Spirochaetes	0.505557	0.833047
	Tenericutes	0.297548	0.419933
	Patescibacteria	0.273691	0.18687
	Fibrobacteres	0.141409	0.20898
	Cyanobacteria	0.112547	0.0932118
	Epsilonbacteraeota	0.0983048	0.0653916
	Fusobacteria	0.0852322	0.0317525
	WPS-2	0.0529171	0.0195652
	Chloroflexi	0.0324102	0.0713702
	Acidobacteria	0.026309	0.0105828
	Verrucomicrobia	0.0262196	0.0369452
	Kiritimatiellaeota	0.0223597	0.0336716
	Synergistetes	0.0201534	0.16531
	Elusimicrobia	0.0168127	0.0263925
	Gemmatimonadetes	0.00648128	0.00306076
	Planctomycetes	0.00396554	0
	Deferribacteres	0	0
	Deinococcus-Thermus	0	0
	Latescibacteria	0	0
	Lentisphaerae	0	0.00742439
	Nitrospirae	0	0
	Rokubacteria	0	0
	unidentifed	0.00445588	0.00333034

## Sheet: Table S7-2
Table S7-2. The bacterial community composition at the phylum level in the rumen of 56-day-old kids and their mothers (%)
	Genus	RU-M	RU-D56
Top 20	Prevotella	24.2126	19.9978
	Rikenellaceae RC9 gut group	12.1899	9.73299
	Christensenellaceae R-7 group	4.82723	6.48634
	Ruminococcaceae NK4A214 group	4.65661	5.00838
	Ruminococcaceae UCG-014	3.25421	3.39641
	Ruminococcaceae UCG-011	2.53021	3.05655
	Prevotellaceae UCG-003	1.37507	2.88911
	uncultured rumen bacterium	2.17088	1.92103
	Ruminococcus	4.08709	3.7978
	[Eubacterium] coprostanoligenes group	1.43398	1.7374
	uncultured rumen bacterium	1.23394	1.84131
	Succiniclasticum	1.83536	0.97599
	Ruminococcaceae UCG-005	1.06119	1.51573
	Saccharofermentans	1.27732	1.18785
	Prevotellaceae UCG-001	1.716	0.718886
	Lachnospiraceae AC2044 group	0.976428	1.35827
	Lachnospiraceae XPB1014 group	0.858911	1.46467
	Ruminococcaceae UCG-010	1.01814	1.05604
	Succinivibrionaceae UCG-002	0.720901	1.23091
Others	SP3-e08	0.387223	1.40906
	uncultured rumen bacterium	0.610428	0.886129
	Ruminococcaceae UCG-002	0.393046	1.02432
	Butyrivibrio 2	0.740668	0.64977
	Prevotellaceae NK3B31 group	1.05	0.233183
	Papillibacter	0.538128	0.73576
	Treponema 2	0.452101	0.791272
	Ruminobacter	0.965108	0.152138
	[Eubacterium] ruminantium group	0.289423	0.758169
	Lachnospiraceae NK3A20 group	0.471265	0.521271
	uncultured rumen bacterium	0.77864	0.171622
	CAG-352	0.512261	0.296003
	Pseudobutyrivibrio	0.351679	0.455189
	Moryella	0.509132	0.233453
	Veillonellaceae UCG-001	0.248659	0.490191
	uncultured rumen bacterium	0.294431	0.438979
	Lachnospiraceae NK4A136 group	0.400974	0.308139
	Anaerovorax	0.312532	0.377636
	Blautia	0.379083	0.253393
	Prevotellaceae UCG-004	0.116205	0.504102
	Lachnoclostridium 10	0.139933	0.479939
	Bacteroides	0.202206	0.404079
	uncultured rumen bacterium	0.19	0.405766
	Erysipelotrichaceae UCG-004	0.286532	0.30842
	uncultured rumen bacterium	0.257152	0.314675
	Bacteroidales bacterium Bact_22	0.0458984	0.499523
	probable genus 10	0.225002	0.315349
	uncultured rumen bacterium	0.451235	0.0303494
	Family XIII AD3011 group	0.193569	0.263764
	Desulfovibrio	0.161551	0.266513
	Candidatus Saccharimonas	0.21372	0.165836
	U29-B03	0.311986	0.0548665
	Ruminiclostridium 6	0.142141	0.211404
	Fibrobacter	0.140599	0.208007
	Faecalibacterium	0.204093	0.121096
	Ruminococcaceae UCG-013	0.121637	0.194806
	Lachnospiraceae ND3007 group	0.150449	0.157249
	Ruminiclostridium 9	0.186723	0.106039
	Alistipes	0.0829116	0.205576
	Quinella	0.0901258	0.198121
	Lachnospiraceae UCG-008	0.157598	0.120316
	Coprococcus 2	0.0178503	0.253852
	Alloprevotella	0.0635314	0.202512
	Ruminococcaceae UCG-004	0.108546	0.141871
	Oribacterium	0.168032	0.0816235
	Selenomonas 1	0.159594	0.0767355
	[Ruminococcus] gauvreauii group	0.126328	0.0993521
	Lachnospiraceae UCG-006	0.129532	0.0939176
	Ruminococcaceae UCG-001	0.114181	0.0991285
	Clostridium sensu stricto 1	0.117892	0.0943133
	Roseburia	0.127808	0.0829796
	Anaerovibrio	0.122837	0.0875733
	Ruminiclostridium 1	0.124859	0.0801977
	Escherichia-Shigella	0.0666415	0.137144
	Acetitomaculum	0.0871971	0.114523
	Streptococcus	0.14016	0.0434098
	Bifidobacterium	0.137142	0.0449522
	Fretibacterium	0.0201534	0.156705
	Lachnospiraceae FCS020 group	0.0996909	0.0748722
	[Eubacterium] hallii group	0.111084	0.0510525
	Succinivibrio	0.0606814	0.100744
	[Eubacterium] nodatum group	0.071056	0.0729817
	Erysipelotrichaceae UCG-009	0.10282	0.0411686
	Bibersteinia	0.111573	0.0255054
	Oscillibacter	0.0631083	0.0719574
	[Ruminococcus] torques group	0.0589093	0.0750645
	Lactobacillus	0.0513543	0.0819705
	Parabacteroides	0.0112496	0.119779
	Cellulosimicrobium	0.119836	0.00787054
	Coprococcus 1	0.0816456	0.0457346
	Subdoligranulum	0.0752699	0.0494311
	Lachnoclostridium 1	0.0950908	0.0290006
	Lachnospiraceae UCG-002	0.0557325	0.0673614
	Lachnospiraceae UCG-010	0.0504368	0.0708987
	Agathobacter	0.0828759	0.037408
	Ruminococcaceae V9D2013 group	0.0385809	0.0802988
	Defluviitaleaceae UCG-011	0.062319	0.0484873
	uncultured rumen bacterium	0.0598618	0.0505638
	Prevotellaceae YAB2003 group	0.0838531	0.0162123
	Butyricicoccus	0.00851922	0.0914831
	Dorea	0.0694119	0.0295451
	Romboutsia	0.0622659	0.0355678
	Cetobacterium	0.0643557	0.0310505
	Thiobacillus	0.068076	0.0266704
	Mailhella	0.0246032	0.0665415
	DNF00809	0.0260308	0.0646027
	gut metagenome	0.0413053	0.0492299
	Mannheimia	0.0578227	0.0322267
	[Eubacterium] brachy group	0.0502249	0.0389845
	[Anaerorhabdus] furcosa group	0.0441247	0.0445218
	Campylobacter	0.0427162	0.044093
	Syntrophococcus	0.0539633	0.0326803
	Ruminococcaceae UCG-009	0.0305001	0.0557835
	Intrasporangium	0.0568748	0.0290599
	Marvinbryantia	0.0456481	0.0398663
	Ruminiclostridium	0.044395	0.0385959
	uncultured rumen bacterium	0.0583514	0.021034
	Holdemanella	0.0496367	0.0294454
	Defluviicoccus	0.0464353	0.0325172
	Moraxella	0.0661927	0.00878662
	Burkholderiales bacterium Beta_02	0.0529171	0.0195652
	Sphaerochaeta	0.0414498	0.0309593
	Phascolarctobacterium	0.0340644	0.0379558
	Lachnoclostridium	0.0372455	0.030096
	Bacillus	0.0466917	0.0179016
	Family XIII UCG-001	0.0300407	0.0344668
	Anaeroplasma	0.0207966	0.0427655
	Lysobacter	0.042292	0.0192321
	Oscillospira	0.00857274	0.0486882
	Staphylococcus	0.0539429	0.00304192
	Flexilinea	0	0.056451
	[Bacteroides] pectinophilus group	0.0555222	0
	uncultured rumen bacterium	0.0201566	0.0336716
	Candidatus Soleaferrea	0.0214265	0.0286434
	[Eubacterium] ventriosum group	0.0348959	0.0146569
	Pseudomonas	0.0387746	0.0104941
	Howardella	0.0259541	0.0225683
	Sulfuricurvum	0.0362441	0.0115872
	Akkermansia	0.0209592	0.026029
	Anaerosporobacter	0.0239769	0.0227096
	Alysiella	0.02118	0.0249862
	Youngiibacter	0.0305038	0.0149211
	Mycoplasma	0.00731463	0.0376175
	Atopobium	0.009683	0.0336455
	Acinetobacter	0.0349078	0.00765191
	Ruminiclostridium 5	0.0162488	0.0257205
	Fournierella	0	0.0418766
	Thioalkalispira	0.0247881	0.015688
	Lachnospiraceae UCG-009	0.0150373	0.0249219
	Solobacterium	0.00322767	0.0364032
	Neisseria	0.030892	0.00816653
	Erysipelotrichaceae UCG-008	0.0262536	0.0120274
	Macellibacteroides	0.0310633	0.00655878
	Fusicatenibacter	0.0279024	0.00919928
	Shuttleworthia	0.00866175	0.0282328
	uncultured rumen bacterium	0.0105856	0.0258379
	uncultured rumen bacterium	0.0187015	0.0174776
	Tyzzerella 4	0.0108756	0.0246057
	Tyzzerella 3	0.0170004	0.0182799
	Collinsella	0.0245394	0.00956997
	[Eubacterium] xylanophilum group	0.017575	0.0163809
	Erysipelotrichaceae UCG-003	0.0214076	0.0121027
	[Eubacterium] saphenum group	0.0222495	0.0104451
	Anaerofustis	0.0191379	0.013034
	Selenomonas 3	0.0320298	0
	Sphingobium	0.0242978	0.00743329
	[Eubacterium] oxidoreducens group	0.00243048	0.0287392
	uncultured rumen bacterium	0.015674	0.0149525
	Prevotellaceae Ga6A1 group	0.013492	0.0168014
	Turicibacter	0.0123347	0.0173997
	Geobacter	0.0247029	0.00480977
	uncultured rumen bacterium	0.00911951	0.0201861
	Corynebacterium 1	0.0265214	0.00269102
	Sulfurovum	0.0181292	0.00846147
	Pseudoxanthomonas	0.0196998	0.006417
	Enterococcus	0.00599424	0.0199698
	Intestinimonas	0	0.0257189
	Mogibacterium	0.0154334	0.010079
	Porphyromonas	0.0193582	0.0060749
	Phenylobacterium	0.0185869	0.00671246
	uncultured rumen bacterium	0.00243048	0.0227267
	Peptococcus	0.00121524	0.0233994
	GCA-900066575	0.0149616	0.00915194
	uncultured rumen bacterium	0.0156062	0.00849274
	Clostridium sensu stricto 13	0.0135667	0.0105059
	Aerococcus	0.024063	0
	FD2005	0.00992794	0.0131032
	dgA-11 gut group	0.0091329	0.0137204
	Candidatus Endomicrobium	0.00402698	0.0184
	Sediminispirochaeta	0.0120061	0.01016
	Proteiniclasticum	0.012387	0.00975786
	uncultured rumen bacterium	0.00856357	0.0129875
	Ciceribacter	0.0168428	0.00437252
	Novosphingobium	0.0159556	0.0050284
	Rikenella	0.0177215	0.00306076
	Elusimicrobium	0.0127857	0.00799249
	Olsenella	0	0.0201859
	Lachnospiraceae UCG-001	0.00092219	0.0187925
	Fusibacter	0.0150662	0.00459115
	Flavihumibacter	0.0152532	0.0041539
	Acetobacter	0.0174786	0.00187195
	Arenimonas	0.0144124	0.00371664
	Anaerofilum	0	0.0181021
	Citrobacter	0.0119885	0.00608385
	Fusobacterium	0.0171877	0.000701983
	Coprococcus 3	0.0044838	0.0132149
	Alcaligenes	0.0164341	0.000655878
	Sphingosinicella	0.0122093	0.00393527
	Sphingomonas	0.00347102	0.0125638
	Haliangium	0.0106956	0.00516671
	Flavonifractor	0.00717408	0.00846255
	Fonticella	0.0103616	0.00516671
	Ruminococcaceae UCG-012	0.00850667	0.00696565
	Sporacetigenium	0.0113146	0.00379348
	Glutamicibacter	0.014887	0
	Vibrio	0.0136588	0.00116997
	Azoarcus	0.0143626	0
	Kocuria	0.014255	0
	Tyzzerella	0	0.0140406
	Allocatelliglobosispora	0.0124722	0.00153038
	uncultured rumen bacterium	0.00526044	0.00843978
	Geothrix	0.0106245	0.00306076
	Bergeyella	0.013288	0.000370038
	Curvibacter	0.00913581	0.00444589
	Salinicoccus	0.0129107	0
	Proteiniphilum	0.00833801	0.00457231
	Desulfuromonas	0.0020254	0.0107684
	Cellulosilyticum	0.00955303	0.00306076
	Parasutterella	0	0.0124253
	Odoribacter	0	0.0123868
	Hydrogenoanaerobacterium	0.00732666	0.0049085
	Marinifilum	0.00835035	0.00371664
	Azospirillum	0.00940926	0.00240489
	Barnesiella	0.0107765	0.000563137
	Pasteurella sp. 37234	0	0.011269
	metagenome	0.00704986	0.0042119
	Butyricimonas	0	0.0110938
	Jeotgalicoccus	0.0109773	0
	Lachnospiraceae NK4B4 group	0.00184438	0.00894573
	Desulfoprunum	0.00484678	0.00585333
	Anaerotruncus	0	0.0106232
	Bilophila	0.0026437	0.00778826
	Faecalitalea	0.00269028	0.00740583
	[Desulfobacterium] catecholicum group	0.00616862	0.00371664
	Parvibacter	0.00969355	0
	[Ruminococcus] gnavus group	0.0022419	0.00683206
	CAG-56	0.0089676	0
	Ruminococcaceae UCG-003	0.00807084	0.000874504
	metagenome	0.00713177	0.00153038
	Pyramidobacter	0	0.008605
	Cutibacterium	0.00738293	0.000874504
	Dongia	0.00243048	0.00580722
	Marmoricola	0.00572801	0.00240489
	Tepidibacillus sp. Z9_2	0.00793109	0
	Lachnospiraceae FE2018 group	0.0058205	0.00210856
	uncultured rumen bacterium	0	0.00784838
	Lachnospiraceae UCG-004	0.00538056	0.00244103
	Chelatococcus	0.00396554	0.00362096
	Erysipelatoclostridium	0	0.00756231
	Clostridium sensu stricto 6	0.00414986	0.00333256
	Veillonella	0.00440616	0.00304192
	Garicola	0.00744651	0
	Psychrobacillus	0.00737752	0
	Sedimentibacter	0.00727725	0
	Shinella	0.0067257	0
	WCHB1-32	0.00390489	0.00280793
	hoa5-07d05 gut group	0	0.00665625
	Prevotella 2	0.0043106	0.00218626
	Morganella	0.00645533	0
	Rheinheimera	0.00308431	0.00327939
	Lachnospira	0.00627732	0
	Trichococcus	0.0040508	0.00218626
	Paracoccus	0	0.00622089
	966-1	0.00607428	0
	Allobaculum	0	0.00603135
	Desulfocapsa	0.00390489	0.00210595
	Achromobacter	0.00368876	0.00230921
	Atopostipes	0.00599424	0
	Phreatobacter	0.0056404	0
	Anaeromyxobacter	0.00364572	0.00196763
	Mucinivorans	0.00364572	0.00174901
	Stenotrophomonas	0.00358704	0.00174901
	Desulforhabdus	0.00283556	0.0024971
	Rummeliibacillus	0.00445588	0.000874504
	Brevundimonas	0.00313866	0.00218626
	uncultured rumen bacterium	0	0.00531129
	Allorhizobium-Neorhizobium-Pararhizobium-Rhizobium	0	0.0048063
	Micromonospora	0.00477265	0
	Methylobacterium	0	0.00473859
	Pygmaiobacter	0	0.00468688
	Negativibacillus	0	0.00462518
	Filifactor	0.00414986	0.000467988
	Epulopiscium	0	0.0046022
	Ruminococcaceae UCG-007	0	0.00459417
	Bradyrhizobium	0.00324064	0.00131176
	uncultured rumen bacterium	0.00162032	0.00289593
	Porphyrobacter	0.0044838	0
	gut metagenome	0.00162032	0.00284214
	Thermomonas	0.00243048	0.00196763
	Stappia	0.00433877	0
	Blvii28 wastewater-sludge group	0	0.00428513
	Paeniclostridium	0	0.00427769
	Ureaplasma	0.00422848	0
	Syntrophorhabdus	0.0026437	0.00153038
	Luteimonas	0	0.0041539
	Marinilactibacillus	0.00414986	0
	Ruminococcaceae UCG-008	0.00396554	0
	p-1088-a5 gut group	0.00396554	0
	Psychrobacter	0.00390489	0
	Devosia	0.00269028	0.00109313
	Gordonibacter	0	0.00371664
	uncultured rumen bacterium	0	0.00371664
	Comamonas	0.00368876	0
	Yaniella	0.00368876	0
	Delftia	0.00368876	0
	Leptotrichia	0.00368876	0
	Prevotella 7	0.00352493	0
	Enterorhabdus	0	0.0033076
	Terrisporobacter	0	0.00327939
	Sutterella	0.00324064	0
	Dielma	0	0.00322789
	Leucobacter	0.00322767	0
	Aquabacterium	0.00322767	0
	Lautropia	0.00322767	0
	Polyangium	0	0.00315297
	Anaerostipes	0.00243048	0.000630015
	Planococcus	0	0.00304192
	Legionella	0	0.00291898
	Dubosiella	0.00176246	0.00109313
	Thauera	0	0.00284214
	Brevibacterium	0.00276657	0
	MSBL7	0.000881232	0.00187195
	Sphingoaurantiacus	0.0026437	0
	Lysinibacillus	0	0.00262797
	Dysgonomonas	0.00184438	0.000750849
	uncultured rumen bacterium	0	0.0024764
	[Cytophaga] xylanolytica group	0.00243048	0
	Hydrogenophaga	0	0.00240489
	Corynebacterium	0	0.00233994
	Smithella	0	0.00233994
	Roseitalea	0	0.00233994
	Facklamia	0.00230548	0
	Halomonas	0.00230548	0
	Alkalibacterium	0.00230548	0
	Rhodococcus	0.00230548	0
	Caproiciproducens	0	0.00229458
	[Eubacterium] eligens group	0	0.00218626
	Prevotella 6	0.00176246	0.000382848
	Falsochrobactrum	0	0.00210566
	Ralstonia	0	0.00204868
	Algoriphagus	0.000867754	0.00116997
	Dialister	0.0020254	0
	F0058	0.0020254	0
	Aeribacillus	0.0020254	0
	Candidatus Stoquefichus	0.000810159	0.00119186
	BSV13	0	0.00196763
	Gracilibacter	0	0.00196763
	metagenome	0.000867754	0.00109313
	Merdibacter	0	0.00189771
	GCA-900066225	0	0.00185019
	Microvirgula	0.00184438	0
	Butyrivibrio	0	0.00184398
	Holdemania	0	0.00179317
	Desulfitobacterium	0.00176246	0
	Mycobacterium	0	0.00174901
	Roseomonas	0	0.00174901
	Breznakia	0	0.00168004
	Pseudoflavonifractor	0	0.00166517
	Arcobacter	0.00121524	0.000375425
	Thioclava	0	0.00153038
	Rhodoplanes	0	0.00153038
	[Acetivibrio] ethanolgignens group	0	0.00147004
	Lachnospiraceae NC2004 group	0	0.00146423
	Paraeggerthella	0	0.0013905
	Marinospirillum	0.00134514	0
	Petrimonas	0.00132185	0
	Streptomyces	0	0.00131176
	Vischeria sp. CAUP Q 202	0	0.00131176
	BD1-7 clade	0	0.00131176
	UBA1819	0	0.00111011
	Blastomonas	0	0.00109313
	alphaI cluster	0	0.00109313
	Brooklawnia	0	0.00109313
	Finegoldia	0	0.00109313
	Nordella	0	0.000935977
	Azospirillum sp. 47_25	0	0.000896584
	Desulfosporosinus	0.000881232	0
	Oligoflexus	0.000881232	0
	Helicobacter	0	0.000874504
	Paraprevotella	0.000867754	0
	Sellimonas	0	0.00084825
	Eggerthella	0	0.000767325
	gut metagenome	0	0.000760523
	Megamonas	0	0.000672438
	GWE2-31-10	0	0.000655878
	Capnocytophaga	0	0.000655878
	Dechloromonas	0	0.000655878
	Desulfobulbus	0	0.00059593
	Parvimonas	0	0.000448292
	Snodgrassella	0	0.000437252
	Eubacterium	0	0.000417771
	Johnsonella	0	0.000397287
	unidentified	8.16802	9.03475
