# Supplementary material for: Distinct Stage Changes in Early-Life Colonization and Acquisition of the Gut Microbiota and Its Correlations With Volatile Fatty Acids in Goat Kids
Source: Front Microbiol. 2020 Oct 9;11:584742. doi: 10.3389/fmicb.2020.584742 (PMC7581860; doi:10.3389/fmicb.2020.584742)
Supplement: Supplementary file 1 [file Data_Sheet_1.ZIP › Supplementary_materials_0902/Table S8 The bacterial biomarkers in the rumen microbiota of 56-day-old kids and their mothers using LEfSe analysis.xlsx]

## Sheet: Sheet1
Table S8 The bacterial biomarkers in the rumen microbiota of 56-day-old kids and their mothers using LEfSe analysis
Biomarkers	Group	LDA value	P value
p_Bacteroidetes, c_Bacteroidia, o_Bacteroidales,f_F082	RU-D56	3.42902	0.0474184
p_Firmicutes,c_Clostridia,o_Clostridiales,f_Ruminococcaceae,g_Ruminococcus	RU-D56	3.04875	0.0271663
p_Bacteroidetes,c_Bacteroidia,o_Bacteroidales,f_Rikenellaceae,g_SP3_e08	RU-D56	3.05768	0.0202109
p_Bacteroidetes,c_Bacteroidia,o_Bacteroidales,f_Prevotellaceae,g_Prevotellaceae UCG_001	RU-M	3.029	0.0108037
Note: The significance level was LDA score > 3 and P < 0.05
